# Supplementary material for: Non-covalent composites of antiaromatic isophlorin–fullerene
Source: Royal Society of Chemistry journal article supplement (doi:10.1039/c5cc00771b), 2015-01-01
Supplement: c5cc00771b1.pdf [file c5cc00771b1.pdf]

## Supplementary information

### **Non-Covalent Composites of Antiaromatic Isophlorin and Fullerene**

B. Kiran Reddy, Santosh C. Gadekar and Venkataramanarao G. Anand\*

*Indian Institute of Science Education and Research (IISER), Pune – 411008,  
Maharashtra, India*

Email: [vg.anand@iiserpune.ac.in](mailto:vg.anand@iiserpune.ac.in)

All reagents and solvents were of commercial reagent grade and were used without further purification except where noted. Dry CH<sub>2</sub>Cl<sub>2</sub> was obtained by refluxing and distillation over P<sub>2</sub>O<sub>5</sub>. Column chromatography was performed on basic alumina and silica gel (230-400) in glass columns. <sup>1</sup>H NMR spectra were recorded on a JEOL 400 MHz spectrometer, and chemical shifts were reported as the delta scale in ppm relative to CHCl<sub>3</sub> (δ = 7.26 ppm) or (CH<sub>3</sub>)<sub>2</sub>CO (δ = 2.05 ppm) or Toluene-*d*<sub>8</sub> (δ = 7.09, 7.00, 6.98 and 2.09 ppm) as internal reference for <sup>1</sup>H. Electronic spectra were recorded on a Perkin-Elmer λ-950 ultraviolet-visible (UV-vis) spectrophotometer. High Resolution Mass spectra were obtained using WATERS G2 Synapt Mass Spectrometer. Single crystals were grown using suitable solvents and were diffracted on BRUKER KAPPA APEX II CCD Duo diffractometer (operated at 1500 W power: 50 kV, 30 mA) using graphite-monochromated Mo Kα radiation (λ = 0.71073 Å).

[illegible]



c) 

#### Synthetic procedure for 4 :

A mixture of mesophenyl difuromethane, (224 mg, 1 mmol) and the difuromethanediol, (616 mg, 1 mmol) were stirred in 100 ml dry dichloromethane. The solution was bubbled with argon for 10 min.  $\text{BF}_3\cdot\text{OEt}_2$  (0.12 ml, 1 mmol) was added under dark, and the resulting solution was stirred for 2h. After adding five equivalents of  $\text{FeCl}_3$ , solution was opened to air and stirred for additional two hours. The reaction mixture was passed through a short basic alumina column. This mixture was separated by repeated silica gel column chromatography by using  $\text{CH}_2\text{Cl}_2/\text{n-hexane}$  as eluent. A yellowish green color band obtained was identified as **4** (2.5mg) in 2.5% yield.

**$^1\text{H}$  NMR** (400 MHz, Toluene- $d_8$ )  $\delta$  6.67 – 6.53 (m, 6H), 6.09 – 5.96 (m, 4H), 2.53 (d,  $J$  = 4.8 Hz, 4H), 2.17 (d,  $J$  = 4.8 Hz, 4H).  **$^{19}\text{F}$  NMR** (376 MHz, Acetone- $d_6$ )  $\delta$  -143.64 (d,  $J$  = 19.9 Hz), -157.32 (t,  $J$  = 20.4 Hz), -163.07 (t,  $J$  = 20.8 Hz). **UV-vis** ( $\text{CH}_2\text{Cl}_2$ ) :  $\lambda_{\text{max}}(\epsilon)$ : 368(102300), 328(83900); **HRMS**  $m/z$ : calcd. For  $\text{C}_{44}\text{H}_{18}\text{F}_{10}\text{O}_4$  : 800.1035; Observed: 800.1045(100.0%  $M^+$ ). **Crystal data**  $\text{C}_{44}\text{H}_{18}\text{F}_{10}\text{O}_4$ , 2( $\text{C H Cl}_3$ ) ( $M_r$  = 1039.32), monoclinic, space group  $P2_1/c$  (no. 14),  $a$  = 10.3234(9),  $b$  = 15.5838(14),  $c$  = 13.5017(12) Å,  $\alpha$  = 90.00°  $\beta$  = 102.531(2)°  $\gamma$  = 90.00°,  $V$  = 2120.4(3) Å<sup>3</sup>,  $Z$  = 2,  $T$  = 100(2) K,  $D_{\text{calcd}}$  = 1.628 g cm<sup>-3</sup>,  $R_1$  = 0.0408 ( $I > 2s(I)$ ),  $R_w$  (all data) = 0.0475, GOF = 1.268.

#### Synthetic procedure for 5 :

To a solution of **6** (100 mg, 1.39 mmol) in 20 ml of dichloromethane was added a solution of DDQ (136 mg, 5.7 mmol) in 50 ml of dichloromethane. Upon mixing the two solutions, a black precipitate formed immediately. To this 10 ml of hydrazine (95%) was added. After boiling for 10 min, the reaction mixture was passed through a short basic alumina column and further purified by recrystallization in hexane-dichloromethane combination. A green color solid was identified as **5** (20mg) in 20% yield.

**$^1\text{H}$  NMR** (400 MHz,  $(\text{CD}_3)_2\text{CO}$ )  $\delta$  2.16 (d,  $J$  = 4.8 Hz, 4H), 1.81 (d,  $J$  = 4.6 Hz, 4H), -0.38 (s, 2H).  **$^{19}\text{F}$  NMR** (376 MHz,  $\text{CDCl}_3$ )  $\delta$  -139.92 (d,  $J$  = 19.0 Hz), -153.37 (s), -159.91 (s). **UV-vis** ( $\text{CH}_2\text{Cl}_2$ ):  $\lambda_{\text{max}}(\epsilon)$ : 348(112200), 318(97900). **HRMS**  $m/z$ : Calcd. for  $\text{C}_{32}\text{H}_{10}\text{F}_{10}\text{O}_4$ : 648.0419; observed: 648.0419 (100.0%,  $M^+$ ). **Crystal data**  $\text{C}_{32}\text{H}_{10}\text{F}_{10}\text{O}_4$  ( $M_r$  = 648.40), monoclinic, space group  $P2_1/c$ ,  $a$  = 14.649(4),  $b$  = 10.269(3),  $c$  = 8.425(2) Å,  $\alpha$  = 90.00°  $\beta$  = 99.013(6)°  $\gamma$  = 90.00°,  $V$  = 1251.7(6) Å<sup>3</sup>,  $Z$  = 2,  $T$  = 100(2) K,  $D_{\text{calcd}}$  = 1.720 g cm<sup>-3</sup>,  $R_1$  = 0.0497 ( $I > 2s(I)$ ),  $R_w$  (all data) = 0.0380, GOF = 1.035.

#### Synthetic procedure for 6:

A mixture of mesofree difuromethane, (400 mg, 2.7 mmol) and the pentafluoro benzaldehyde, (0.32 ml, 2.7 mmol) were stirred in 500 ml dry dichloromethane. The solution was bubbled with argon for 10 min.  $\text{BF}_3\cdot\text{OEt}_2$  (0.33 ml, 2.7 mmol) was added under dark, and the resulting solution was stirred for 3h. A few drops of triethylamine were then added and the reaction mixture passed through a short basic alumina column. This mixture was further separated by silica gel column chromatography by using 1% ethylacetate/n-hexane as eluent. A white color solid obtained as **6** (160mg) in 2% yield.

**$^1\text{H}$  NMR** (400 MHz,  $\text{CDCl}_3$ )  $\delta$  6.04 (d,  $J$  = 3.0 Hz, 4H), 5.98 (d,  $J$  = 2.8 Hz, 4H), 5.79 (s, 2H), 3.87 (s, 4H).  **$^{19}\text{F}$  NMR** (376 MHz,  $\text{CDCl}_3$ )  $\delta$  -138.93 (dd,  $J$  = 43.3, 19.0 Hz),

-155.11 (d,  $J = 21.1$  Hz), -161.40 (t,  $J = 20.4$  Hz). **HRMS**  $m/z$ : calcd. For  $C_{32}H_{14}F_{10}O_4Na^+$ : 675.0625; Observed: 675.0625 (100.0% (M+Na) $^+$ ).

**Table 1.** Crystal data and structure refinement for **(4)<sub>3</sub>.C<sub>60</sub>**

|                                         |                                                |                               |
|-----------------------------------------|------------------------------------------------|-------------------------------|
| Identification code                     | <b>(4)<sub>3</sub>.C<sub>60</sub></b>          |                               |
| Empirical formula                       | C78.25 H24 F10 O4.75                           |                               |
| Formula weight                          | 1229.97                                        |                               |
| Temperature                             | 100(2) K                                       |                               |
| Wavelength                              | 1.54178 Å                                      |                               |
| Crystal system                          | Triclinic                                      |                               |
| Space group                             | P-1                                            |                               |
| Unit cell dimensions                    | $a = 15.928(2)$ Å                              | $\alpha = 101.456(7)^\circ$ . |
|                                         | $b = 19.014(2)$ Å                              | $\beta = 110.099(7)^\circ$ .  |
|                                         | $c = 20.624(3)$ Å                              | $\gamma = 108.543(7)^\circ$ . |
| Volume                                  | 5218.1(12) Å <sup>3</sup>                      |                               |
| Z                                       | 4                                              |                               |
| Density (calculated)                    | 1.566 Mg/m <sup>3</sup>                        |                               |
| Absorption coefficient                  | 1.033 mm <sup>-1</sup>                         |                               |
| F(000)                                  | 2486                                           |                               |
| Crystal size                            | 0.150 x 0.080 x 0.020 mm <sup>3</sup>          |                               |
| Theta range for data collection         | 2.431 to 67.498°.                              |                               |
| Index ranges                            | -19 ≤ $h$ ≤ 18, -22 ≤ $k$ ≤ 22, -24 ≤ $l$ ≤ 24 |                               |
| Reflections collected                   | 89924                                          |                               |
| Independent reflections                 | 18724 [ $R(\text{int}) = 0.0570$ ]             |                               |
| Completeness to $\theta = 67.679^\circ$ | 99.3 %                                         |                               |
| Absorption correction                   | Semi-empirical from equivalents                |                               |
| Max. and min. transmission              | 0.980 and 0.906                                |                               |
| Refinement method                       | Full-matrix least-squares on F <sup>2</sup>    |                               |
| Data / restraints / parameters          | 18724 / 391 / 1722                             |                               |
| Goodness-of-fit on F <sup>2</sup>       | 1.197                                          |                               |
| Final R indices [ $I > 2\sigma(I)$ ]    | $R_1 = 0.0992$ , $wR_2 = 0.3163$               |                               |
| R indices (all data)                    | $R_1 = 0.1277$ , $wR_2 = 0.3566$               |                               |
| Extinction coefficient                  | n/a                                            |                               |
| Largest diff. peak and hole             | 1.538 and -0.821 e.Å <sup>-3</sup>             |                               |

**Table 2.** Crystal data and structure refinement for **4.(C<sub>60</sub>)<sub>2</sub>**.

|                                   |                                                              |                                         |
|-----------------------------------|--------------------------------------------------------------|-----------------------------------------|
| Identification code               | 4.(C <sub>60</sub> ).2                                       |                                         |
| Empirical formula                 | C <sub>82</sub> H <sub>9</sub> F <sub>5</sub> O <sub>2</sub> |                                         |
| Formula weight                    | 1120.89                                                      |                                         |
| Temperature                       | 100(2) K                                                     |                                         |
| Wavelength                        | 0.71073 Å                                                    |                                         |
| Crystal system                    | Monoclinic                                                   |                                         |
| Space group                       | C2/c                                                         |                                         |
| Unit cell dimensions              | a = 26.962(7) Å<br>b = 13.616(3) Å<br>c = 24.071(5) Å        | α = 90°.<br>β = 97.746(8)°.<br>γ = 90°. |
| Volume                            | 8756(3) Å <sup>3</sup>                                       |                                         |
| Z                                 | 8                                                            |                                         |
| Density (calculated)              | 1.701 Mg/m <sup>3</sup>                                      |                                         |
| Absorption coefficient            | 0.116 mm <sup>-1</sup>                                       |                                         |
| F(000)                            | 4496.0                                                       |                                         |
| Crystal size                      | 0.110 x 0.110 x 0.040 mm <sup>3</sup>                        |                                         |
| Theta range for data collection   | 1.524 to 28.450°.                                            |                                         |
| Index ranges                      | -33 ≤ h ≤ 36, -18 ≤ k ≤ 18, -32 ≤ l ≤ 21                     |                                         |
| Reflections collected             | 77663                                                        |                                         |
| Independent reflections           | 10939 [R(int) = 0.1153]                                      |                                         |
| Completeness to theta = 25.242°   | 100.0 %                                                      |                                         |
| Absorption correction             | Semi-empirical from equivalents                              |                                         |
| Max. and min. transmission        | 0.995 and 0.987                                              |                                         |
| Refinement method                 | Full-matrix least-squares on F <sup>2</sup>                  |                                         |
| Data / restraints / parameters    | 10939 / 0 / 802                                              |                                         |
| Goodness-of-fit on F <sup>2</sup> | 1.022                                                        |                                         |
| Final R indices [I > 2σ(I)]       | R1 = 0.0610, wR2 = 0.1514                                    |                                         |
| R indices (all data)              | R1 = 0.1431, wR2 = 0.1919                                    |                                         |
| Extinction coefficient            | n/a                                                          |                                         |
| Largest diff. peak and hole       | 0.458 and -0.297 e.Å <sup>-3</sup>                           |                                         |

**Table 3.** Crystal data and structure refinement for **5.C<sub>60</sub>**.

|                                   |                                                                                                   |
|-----------------------------------|---------------------------------------------------------------------------------------------------|
| Empirical formula                 | C106 H26 F10 O4                                                                                   |
| Formula weight                    | 1553.27                                                                                           |
| Temperature                       | 100(2) K                                                                                          |
| Wavelength                        | 0.71073 Å                                                                                         |
| Crystal system                    | Monoclinic                                                                                        |
| Space group                       | P2 <sub>1</sub> /c                                                                                |
| Unit cell dimensions              | a = 27.439(4) Å    α = 90°.<br>b = 9.7293(13) Å    β = 97.272(3)°.<br>c = 23.787(3) Å    γ = 90°. |
| Volume                            | 6299.1(14) Å <sup>3</sup>                                                                         |
| Z                                 | 4                                                                                                 |
| Density (calculated)              | 1.638 Mg/m <sup>3</sup>                                                                           |
| Absorption coefficient            | 0.119 mm <sup>-1</sup>                                                                            |
| F(000)                            | 3136                                                                                              |
| Crystal size                      | 0.360 x 0.245 x 0.065 mm <sup>3</sup>                                                             |
| Theta range for data collection   | 0.748 to 28.080°.                                                                                 |
| Index ranges                      | -36 ≤ h ≤ 36, -12 ≤ k ≤ 11, -31 ≤ l ≤ 31                                                          |
| Reflections collected             | 109735                                                                                            |
| Independent reflections           | 15286 [R(int) = 0.0854]                                                                           |
| Completeness to theta = 25.242°   | 99.9 %                                                                                            |
| Absorption correction             | Semi-empirical from equivalents                                                                   |
| Max. and min. transmission        | 0.992 and 0.966                                                                                   |
| Refinement method                 | Full-matrix least-squares on F <sup>2</sup>                                                       |
| Data / restraints / parameters    | 15286 / 0 / 1123                                                                                  |
| Goodness-of-fit on F <sup>2</sup> | 1.214                                                                                             |
| Final R indices [I > 2σ(I)]       | R1 = 0.0613, wR2 = 0.1794                                                                         |
| R indices (all data)              | R1 = 0.0993, wR2 = 0.1995                                                                         |
| Extinction coefficient            | n/a                                                                                               |
| Largest diff. peak and hole       | 0.373 and -0.409 e.Å <sup>-3</sup>                                                                |

**Table 4.** Crystal data and structure refinement for **3.C<sub>60</sub>**.

|                     |                |
|---------------------|----------------|
| Identification code | 3.C60          |
| Empirical formula   | C76 H28 F10 O2 |
| Formula weight      | 1162.98        |
| Temperature         | 100(2) K       |
| Wavelength          | 0.71073 Å      |
| Crystal system      | Tetragonal     |

|                                   |                                             |                       |
|-----------------------------------|---------------------------------------------|-----------------------|
| Space group                       | I41/a                                       |                       |
| Unit cell dimensions              | a = 28.7283(16) Å                           | $\alpha = 90^\circ$ . |
|                                   | b = 28.7283(16) Å                           | $\beta = 90^\circ$ .  |
|                                   | c = 12.1809(9) Å                            | $\gamma = 90^\circ$ . |
| Volume                            | 10053.1(13) Å <sup>3</sup>                  |                       |
| Z                                 | 8                                           |                       |
| Density (calculated)              | 1.537 Mg/m <sup>3</sup>                     |                       |
| Absorption coefficient            | 0.117 mm <sup>-1</sup>                      |                       |
| F(000)                            | 4720                                        |                       |
| Crystal size                      | 0.220 x 0.103 x 0.062 mm <sup>3</sup>       |                       |
| Theta range for data collection   | 1.418 to 28.293°.                           |                       |
| Index ranges                      | -38 ≤ h ≤ 37, -33 ≤ k ≤ 38, -9 ≤ l ≤ 16     |                       |
| Reflections collected             | 28361                                       |                       |
| Independent reflections           | 6246 [R(int) = 0.0642]                      |                       |
| Completeness to theta = 25.242°   | 100.0 %                                     |                       |
| Absorption correction             | Semi-empirical from equivalents             |                       |
| Max. and min. transmission        | 0.993 and 0.986                             |                       |
| Refinement method                 | Full-matrix least-squares on F <sup>2</sup> |                       |
| Data / restraints / parameters    | 6229 / 96 / 412                             |                       |
| Goodness-of-fit on F <sup>2</sup> | 1.234                                       |                       |
| Final R indices [I > 2σ(I)]       | R1 = 0.0648, wR2 = 0.1841                   |                       |
| R indices (all data)              | R1 = 0.1071, wR2 = 0.2043                   |                       |
| Extinction coefficient            | n/a                                         |                       |
| Largest diff. peak and hole       | 0.700 and -0.619 e.Å <sup>-3</sup>          |                       |

**Table 5.** Crystal data and structure refinement for **4**.

|                      |                                                                                |                              |
|----------------------|--------------------------------------------------------------------------------|------------------------------|
| Identification code  | 4                                                                              |                              |
| Empirical formula    | C <sub>46</sub> H <sub>20</sub> Cl <sub>6</sub> F <sub>10</sub> O <sub>4</sub> |                              |
| Formula weight       | 1039.32                                                                        |                              |
| Temperature          | 100(2) K                                                                       |                              |
| Wavelength           | 0.71073 Å                                                                      |                              |
| Crystal system       | Monoclinic                                                                     |                              |
| Space group          | P2 <sub>1</sub> /c                                                             |                              |
| Unit cell dimensions | a = 10.3234(9) Å                                                               | $\alpha = 90^\circ$ .        |
|                      | b = 15.5838(14) Å                                                              | $\beta = 102.531(2)^\circ$ . |
|                      | c = 13.5017(12) Å                                                              | $\gamma = 90^\circ$ .        |
| Volume               | 2120.4(3) Å <sup>3</sup>                                                       |                              |
| Z                    | 2                                                                              |                              |

|                                   |                                             |
|-----------------------------------|---------------------------------------------|
| Density (calculated)              | 1.628 Mg/m <sup>3</sup>                     |
| Absorption coefficient            | 0.496 mm <sup>-1</sup>                      |
| F(000)                            | 1040.0                                      |
| Crystal size                      | 0.220 x 0.110 x 0.060 mm <sup>3</sup>       |
| Theta range for data collection   | 2.021 to 26.368°.                           |
| Index ranges                      | -12 ≤ h ≤ 12, -19 ≤ k ≤ 19, -14 ≤ l ≤ 16    |
| Reflections collected             | 34313                                       |
| Independent reflections           | 4335 [R(int) = 0.0560]                      |
| Completeness to theta = 25.242°   | 100.0 %                                     |
| Absorption correction             | Semi-empirical from equivalents             |
| Max. and min. transmission        | 0.971 and 0.937                             |
| Refinement method                 | Full-matrix least-squares on F <sup>2</sup> |
| Data / restraints / parameters    | 4335 / 84 / 298                             |
| Goodness-of-fit on F <sup>2</sup> | 1.268                                       |
| Final R indices [I > 2σ(I)]       | R1 = 0.0408, wR2 = 0.1460                   |
| R indices (all data)              | R1 = 0.0475, wR2 = 0.1549                   |
| Extinction coefficient            | n/a                                         |
| Largest diff. peak and hole       | 0.686 and -0.668 e.Å <sup>-3</sup>          |

**Table 6.** Crystal data and structure refinement for **5**.

|                                 |                                                                                                       |
|---------------------------------|-------------------------------------------------------------------------------------------------------|
| Identification code             | 5                                                                                                     |
| Empirical formula               | C <sub>32</sub> H <sub>10</sub> F <sub>10</sub> O <sub>4</sub>                                        |
| Formula weight                  | 648.40                                                                                                |
| Temperature                     | 100(2) K                                                                                              |
| Wavelength                      | 0.71073 Å                                                                                             |
| Crystal system                  | Monoclinic                                                                                            |
| Space group                     | P2 <sub>1</sub> /c                                                                                    |
| Unit cell dimensions            | a = 14.649(4) Å      α = 90°.<br>b = 10.269(3) Å      β = 99.012(6)°.<br>c = 8.425(2) Å      γ = 90°. |
| Volume                          | 1251.8(6) Å <sup>3</sup>                                                                              |
| Z                               | 2                                                                                                     |
| Density (calculated)            | 1.720 Mg/m <sup>3</sup>                                                                               |
| Absorption coefficient          | 0.163 mm <sup>-1</sup>                                                                                |
| F(000)                          | 648                                                                                                   |
| Crystal size                    | 0.220 x 0.100 x 0.080 mm <sup>3</sup>                                                                 |
| Theta range for data collection | 2.432 to 29.074°.                                                                                     |
| Index ranges                    | -19 ≤ h ≤ 20, -11 ≤ k ≤ 14, -11 ≤ l ≤ 10                                                              |



|                                   |                                             |
|-----------------------------------|---------------------------------------------|
| Reflections collected             | 15032                                       |
| Independent reflections           | 3342 [R(int) = 0.0300]                      |
| Completeness to theta = 25.242°   | 100.0 %                                     |
| Absorption correction             | Semi-empirical from equivalents             |
| Max. and min. transmission        | 0.987 and 0.981                             |
| Refinement method                 | Full-matrix least-squares on F <sup>2</sup> |
| Data / restraints / parameters    | 3342 / 0 / 208                              |
| Goodness-of-fit on F <sup>2</sup> | 1.035                                       |
| Final R indices [I > 2sigma(I)]   | R1 = 0.0383, wR2 = 0.1021                   |
| R indices (all data)              | R1 = 0.0500, wR2 = 0.1102                   |
| Extinction coefficient            | n/a                                         |
| Largest diff. peak and hole       | 0.440 and -0.223 e.Å <sup>-3</sup>          |

### Density Functional Theory (DFT) Calculations

Quantum mechanical calculations were performed with the Gaussian09<sup>1</sup> program suite using a High Performance Computing Cluster facility of IISER PUNE. All calculations were carried out by Density functional theory (DFT) with Becke's three-parameter hybrid exchange functional and the Lee-Yang-Parr correlation functional (B3LYP) and 6-31G(d,p) basis set for all the atoms were employed in the calculations. The molecular structures obtained from single crystal analysis were used for geometry optimization. To verify the optimized structures frequency calculations were performed where no imaginary frequency was found. To simulate the steady-state absorption spectra, the time-dependent TD-DFT calculations were employed on the optimized structures. Molecular orbital contributions were determined using GaussSum 2.2. Program package. The global ring centres for the NICS (0) values were designated at the non weighted mean centres of the macrocycles. The NICS (0) value was obtained with gauge independent atomic orbital (GIAO) method based on the optimized geometries.

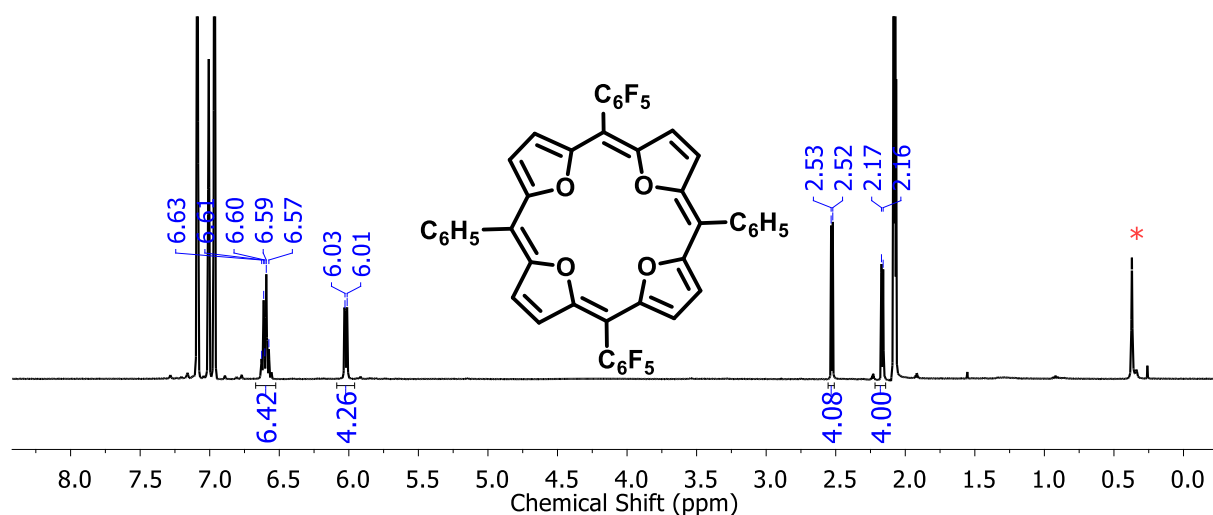

**S1:**  $^1\text{H}$  NMR spectrum of **4** in Toluene- $d_8$  at 298K. Water peak \*

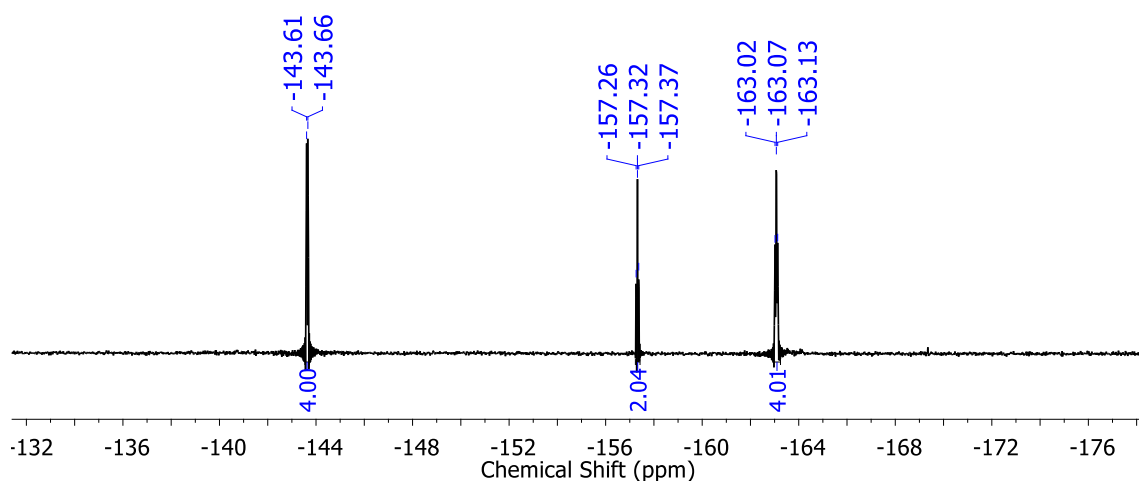

**S2:**  $^{19}\text{F}$  NMR spectrum of **4** in Toluene- $d_8$  at 298K.

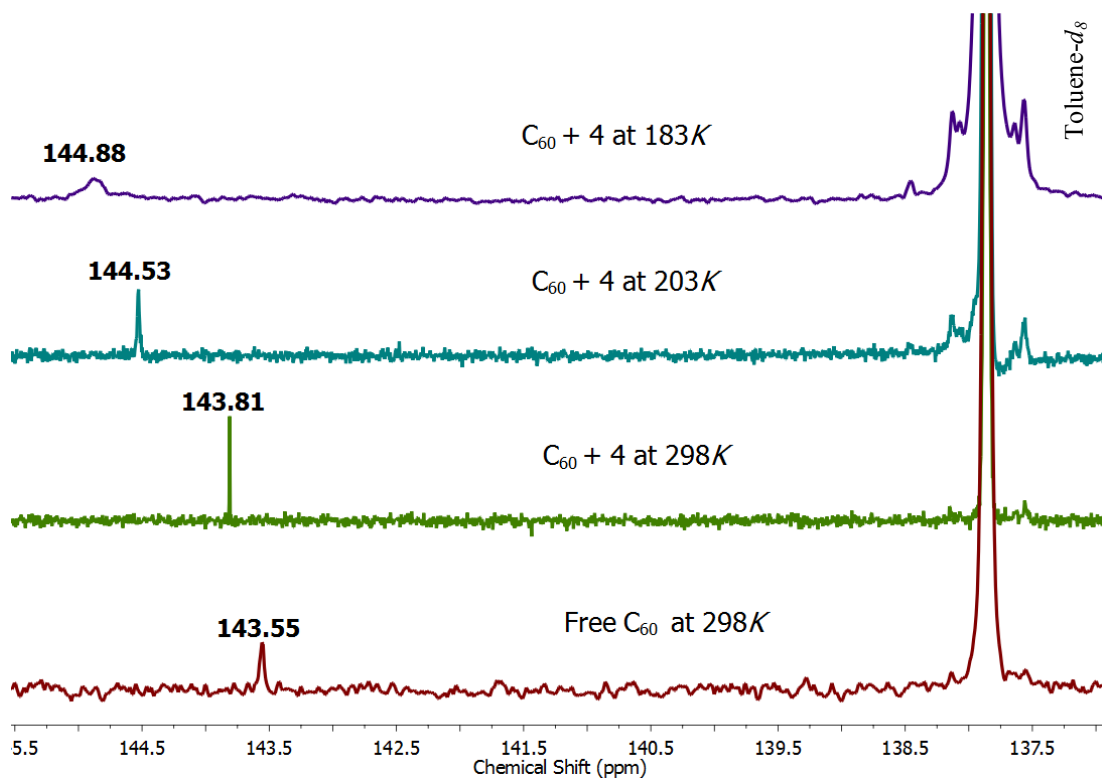

**S3:** Variable temperature  $^{13}\text{C}$  NMR spectrum of **4**. $\text{C}_{60}$  complex 1:1 ratio in Toluene- $d_8$ .

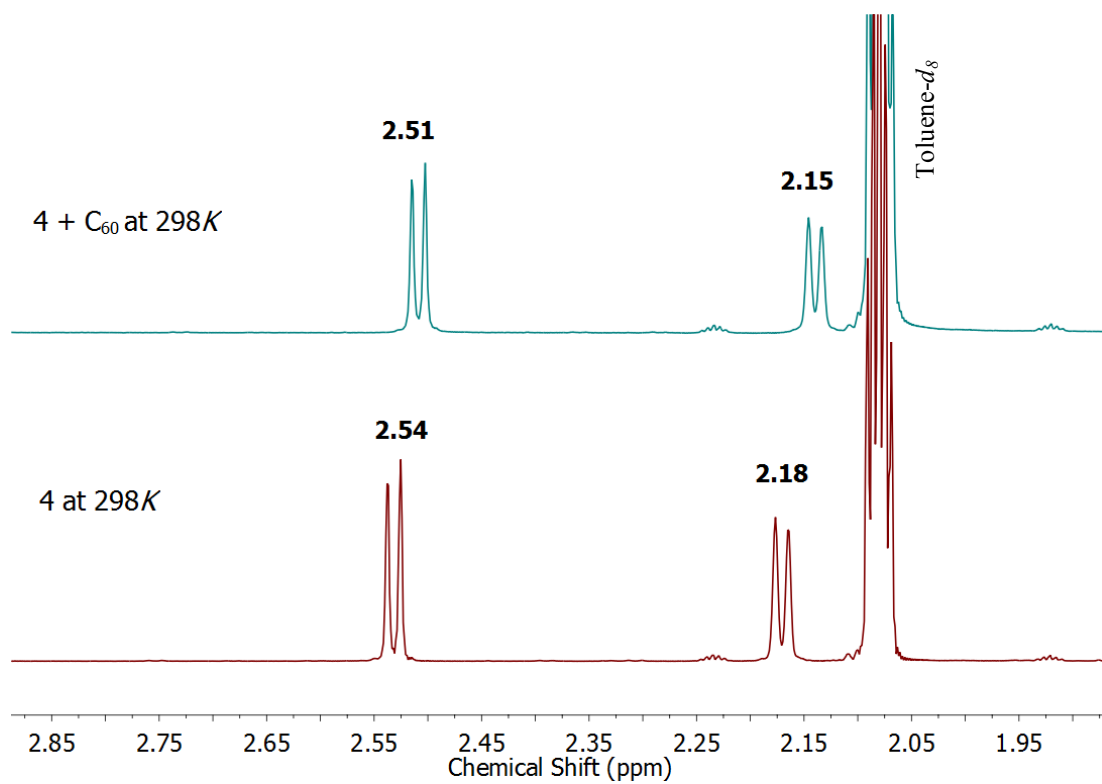

**S4:**  $^1\text{H}$  NMR spectrum of **4**. $\text{C}_{60}$  complex in Toluene- $d_8$  at 298 K.

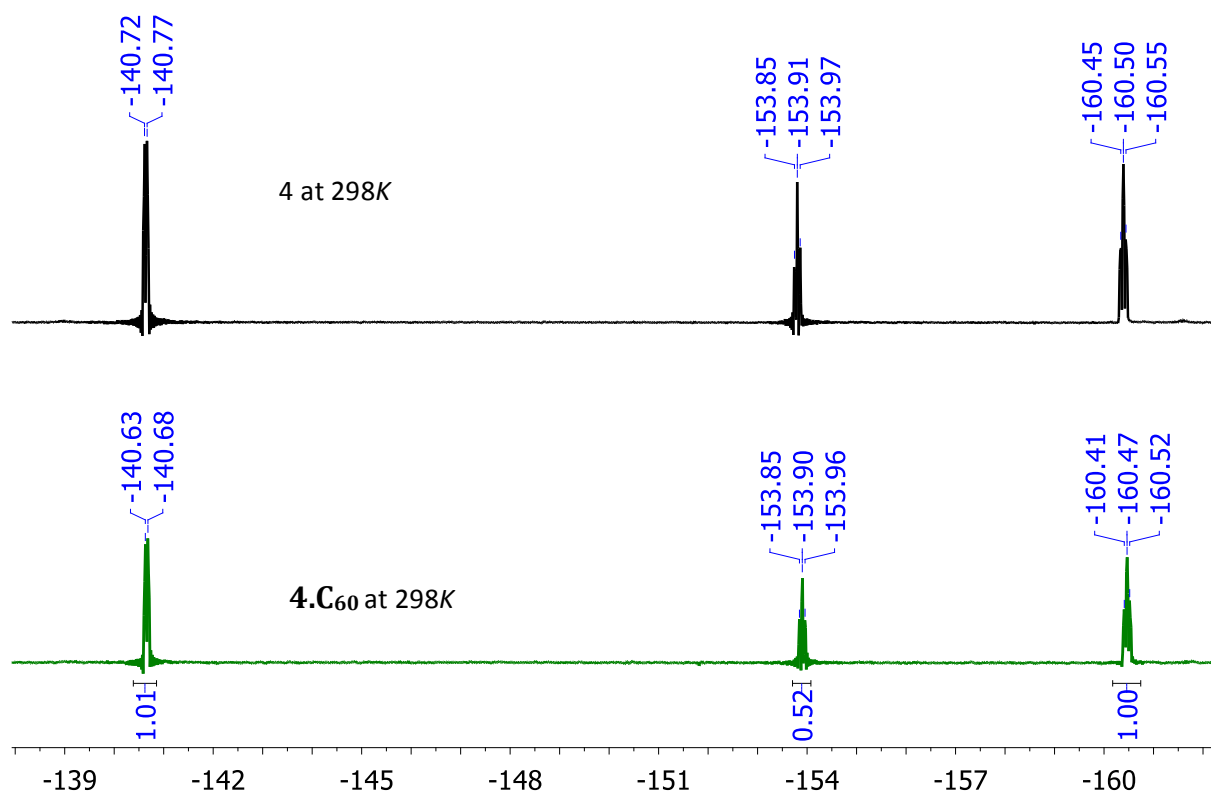

S5:  $^{19}\text{F}$  NMR spectrum of 4.C<sub>60</sub> complex in Toluene-*d*<sub>8</sub> at 298K.

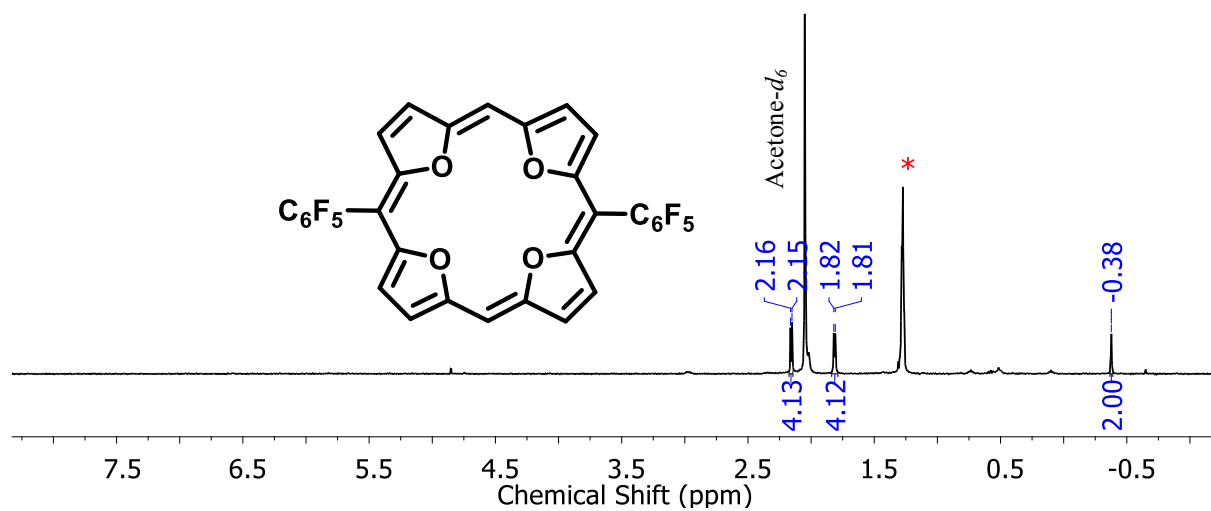

S6:  $^1\text{H}$  NMR spectrum of 5 in Acetone-*d*<sub>6</sub> at 298K. residual solvent peak \*

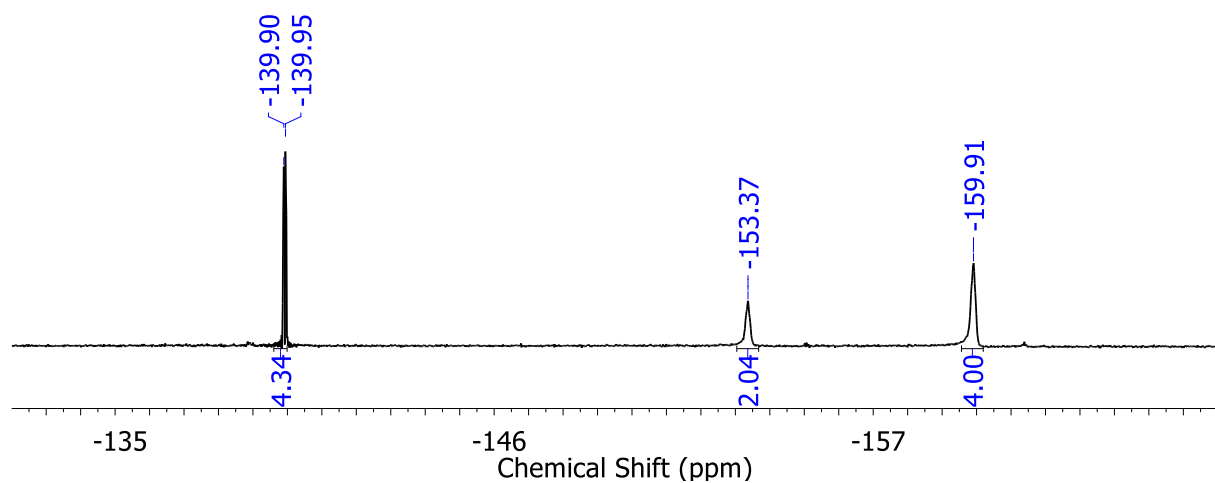

**S7:**  $^{19}\text{F}$  NMR spectrum of **5** in Acetone- $d_6$  at 298K.

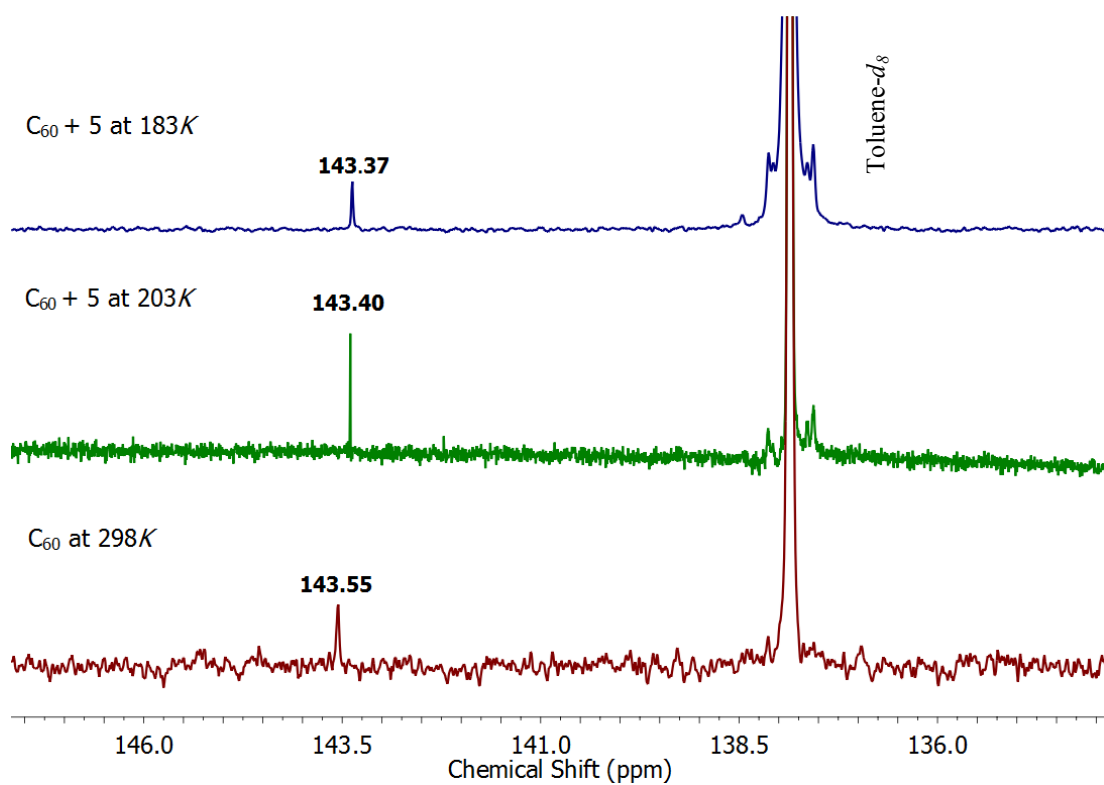

**S8:** Variable temperature  $^{13}\text{C}$  NMR spectrum of **5.C<sub>60</sub>** complex in Toluene- $d_8$ .

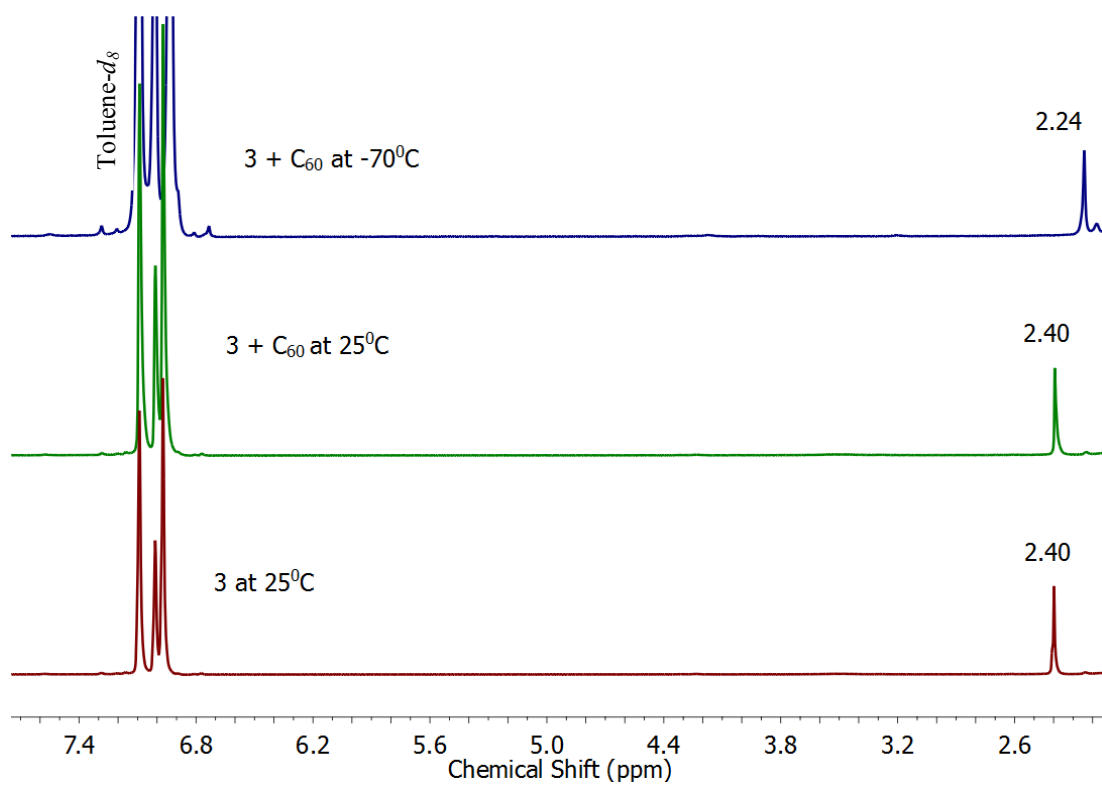

**S9:** Variable temperature  $^1\text{H}$  NMR spectrum of  $3.C_{60}$  complex in  $\text{Toluene-}d_8$ .

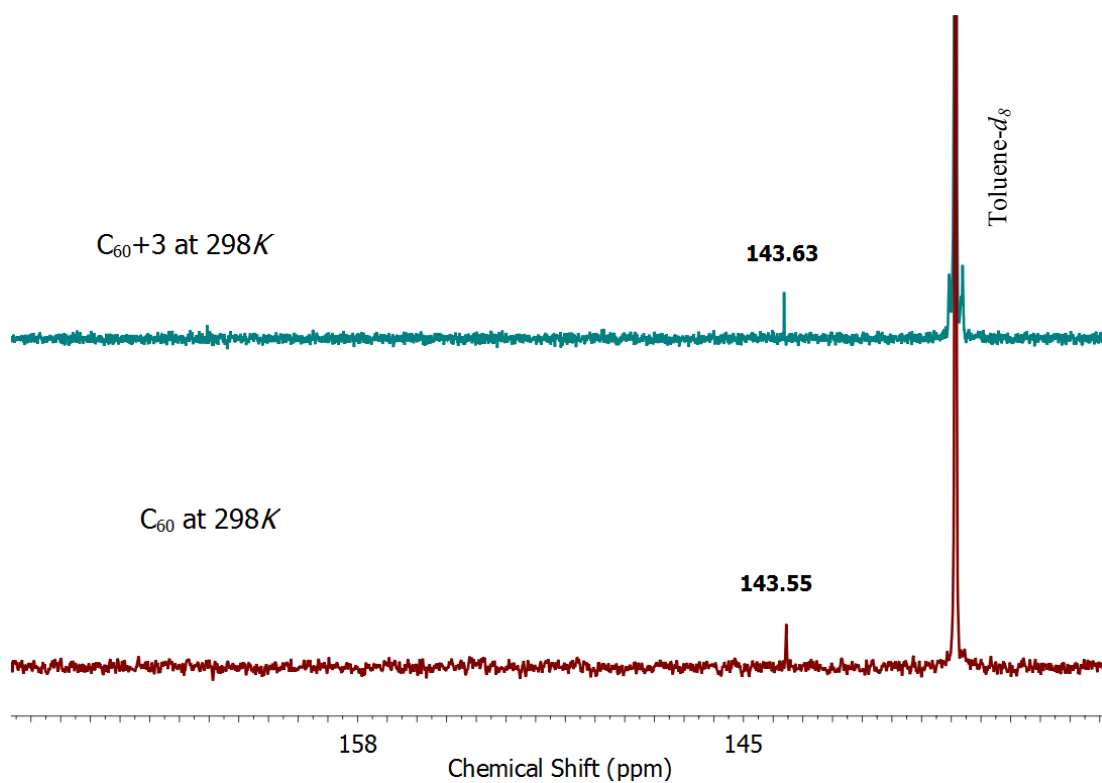

**S10:**  $^{13}\text{C}$  NMR spectrum of  $3.C_{60}$  complex in  $\text{Toluene-}d_8$  at  $298\text{K}$ .

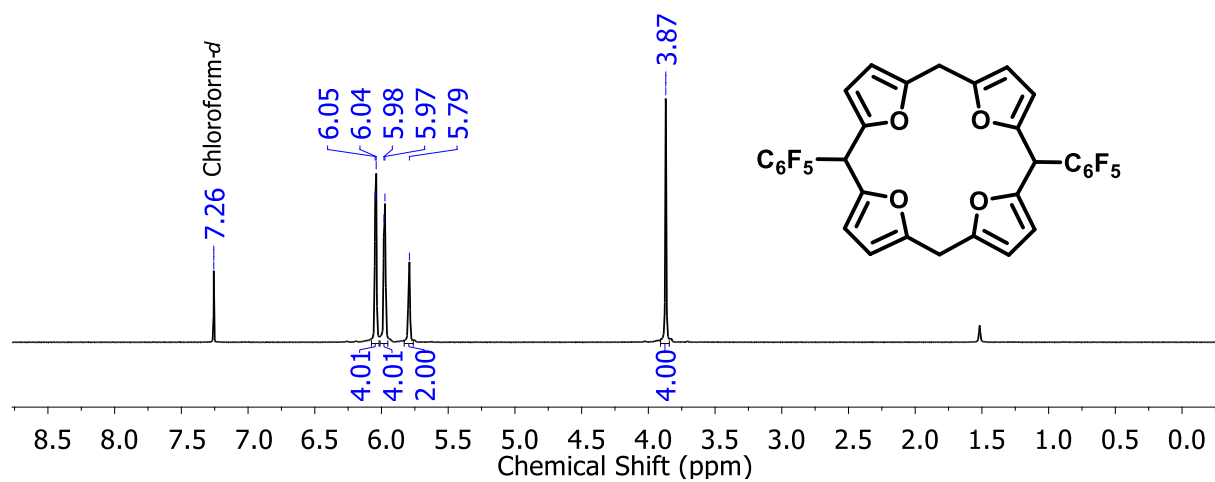

**S11:** <sup>1</sup>H NMR spectrum of **6** in CDCl<sub>3</sub> at 298K.

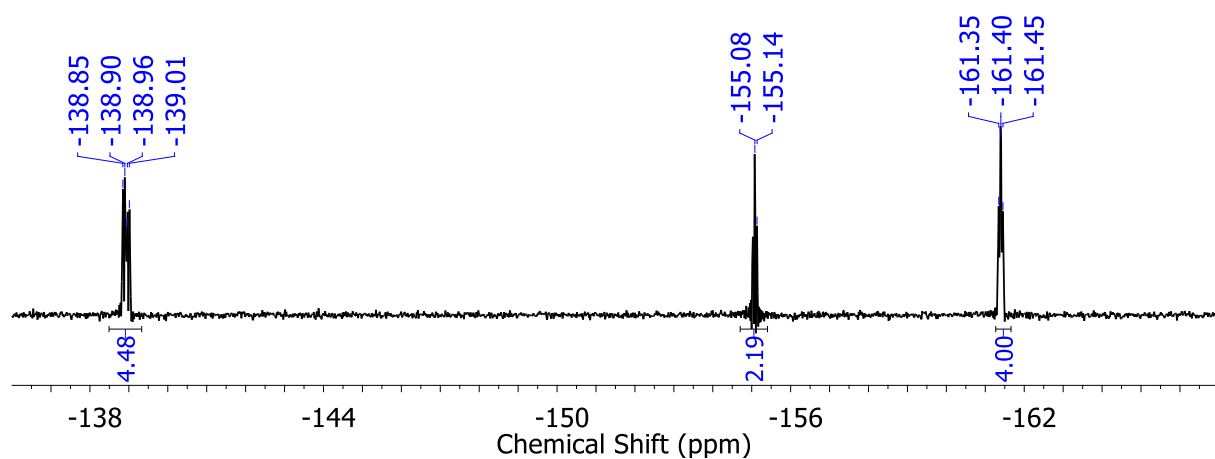

**S12:** <sup>19</sup>F NMR spectrum of **6** in CDCl<sub>3</sub> at 298K.

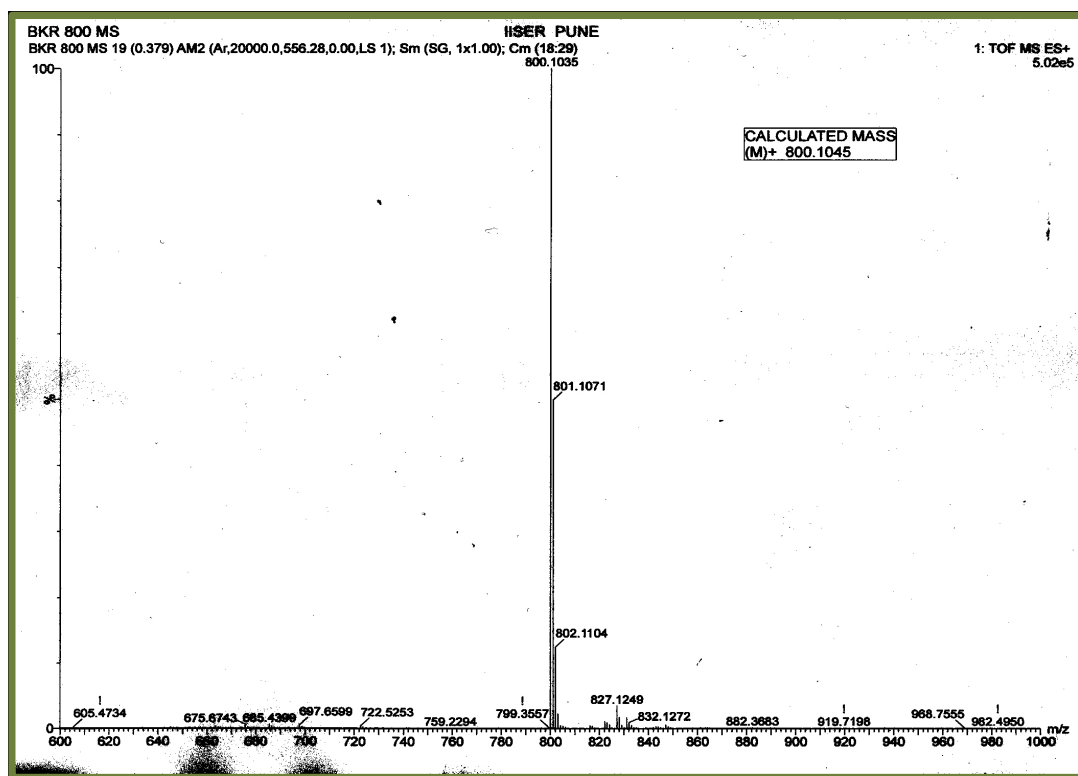

**S13:** HR-ESI-TOF mass spectrum of 4.

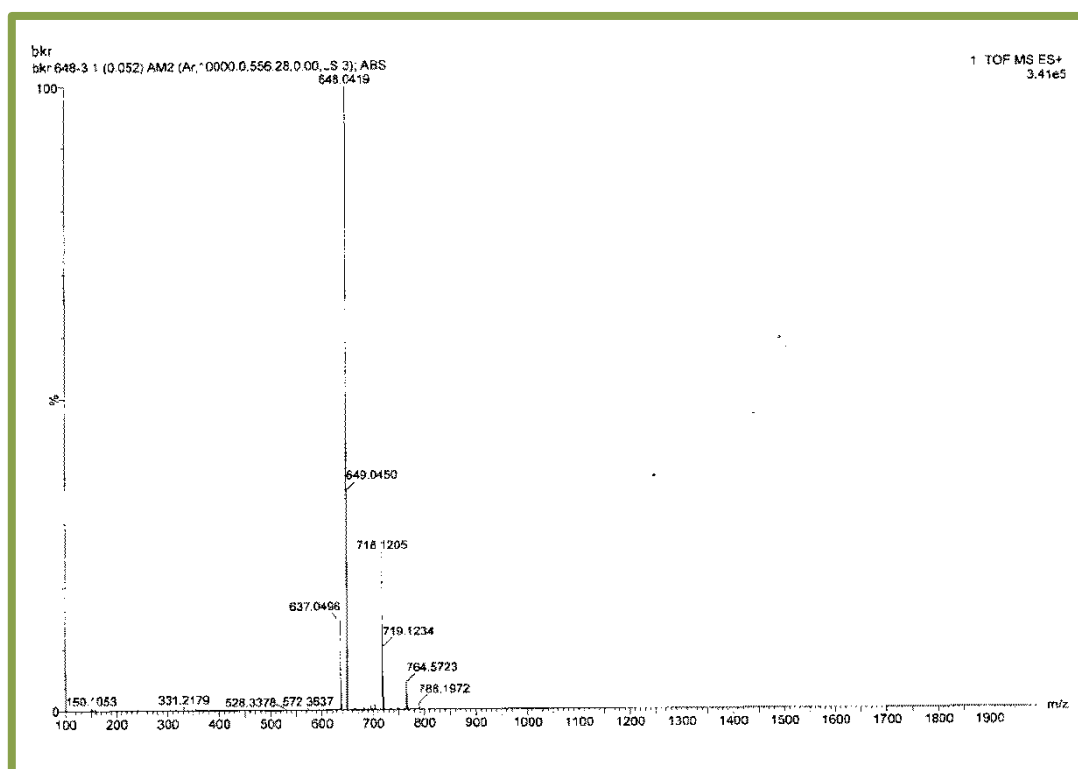

**S14:** HR-ESI-TOF mass spectrum of 5.



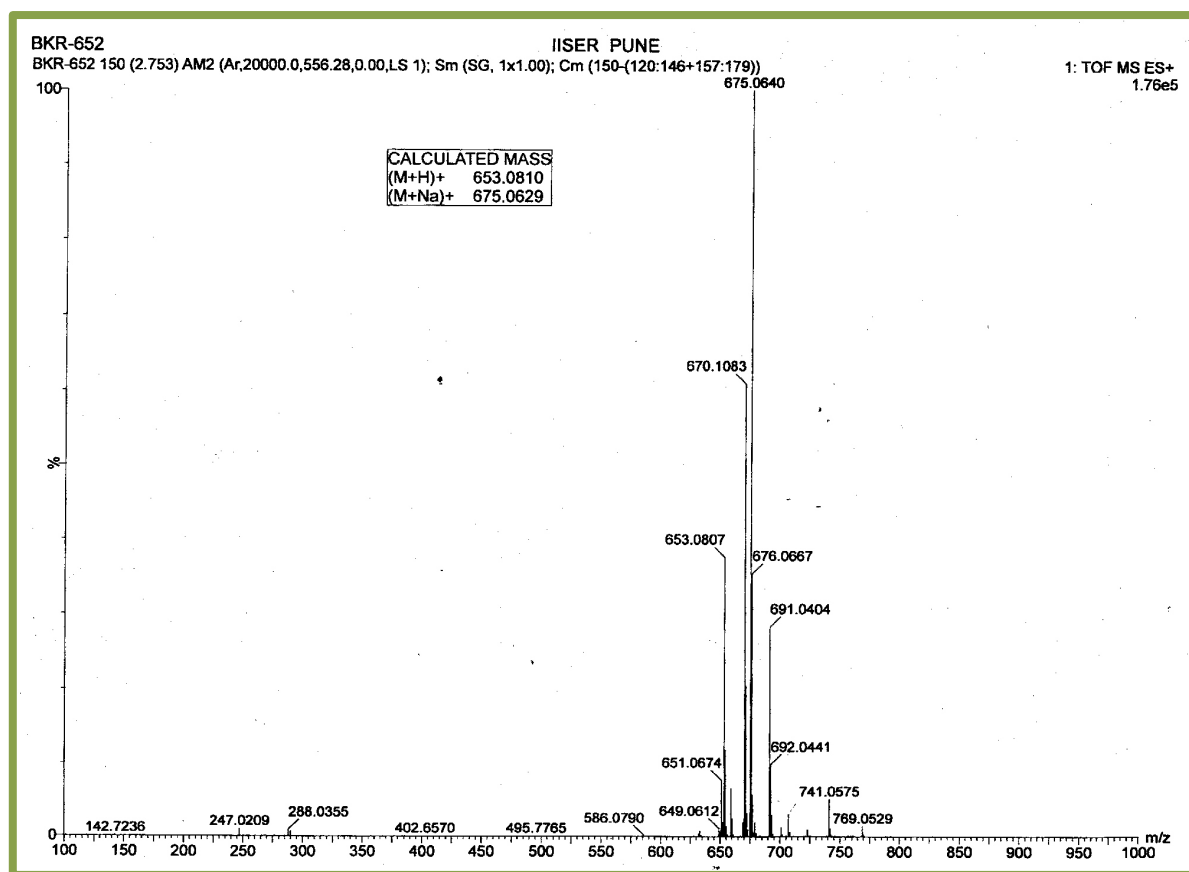

**S15:** HR-ESI-TOF mass spectrum of **6**.

### Cocrystallization method :

The cocrystals were prepared by slow evaporation of isophlorin-fullerene (**4**)<sub>3</sub>.C<sub>60</sub>, **4**.(C<sub>60</sub>)<sub>2</sub> and **5**.C<sub>60</sub> in acetone and toluene combination. Complex **3**.C<sub>60</sub> crystallized in benzene. We attempted different ratios of C<sub>60</sub>/isophlorin, but complex **3**.C<sub>60</sub> and **5**.C<sub>60</sub> selectively cocrystallized in 1:1 fashion. In case of isophlorin **4**, it has been cocrystallized with C<sub>60</sub> in 1:2 and 2:1 ratio displayed in its asymmetric unit of **4**.(C<sub>60</sub>)<sub>2</sub> and (**4**)<sub>3</sub>.C<sub>60</sub> respectively.

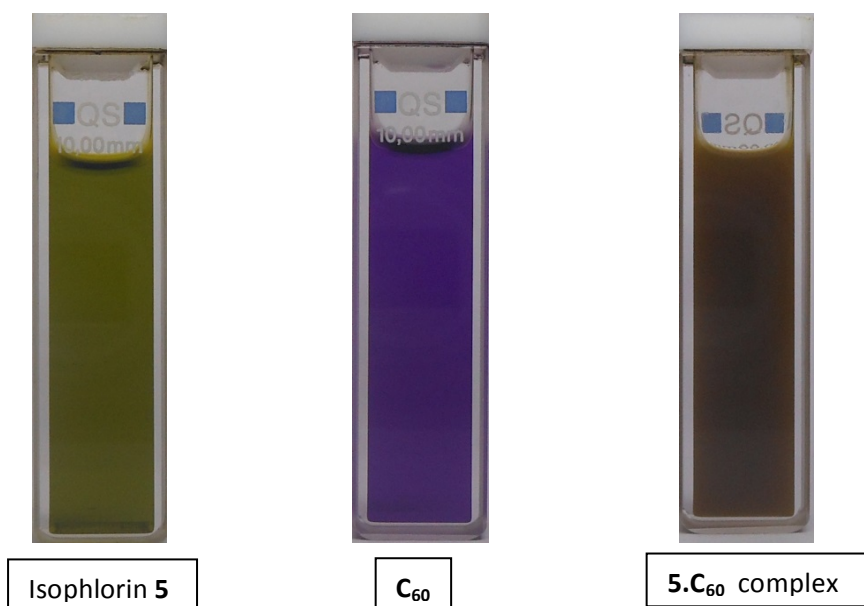

**S16:** Cocrystallization of isophlorin and  $C_{60}$ . The color of the complex solution **5.C<sub>60</sub>** different from that of the individuals.

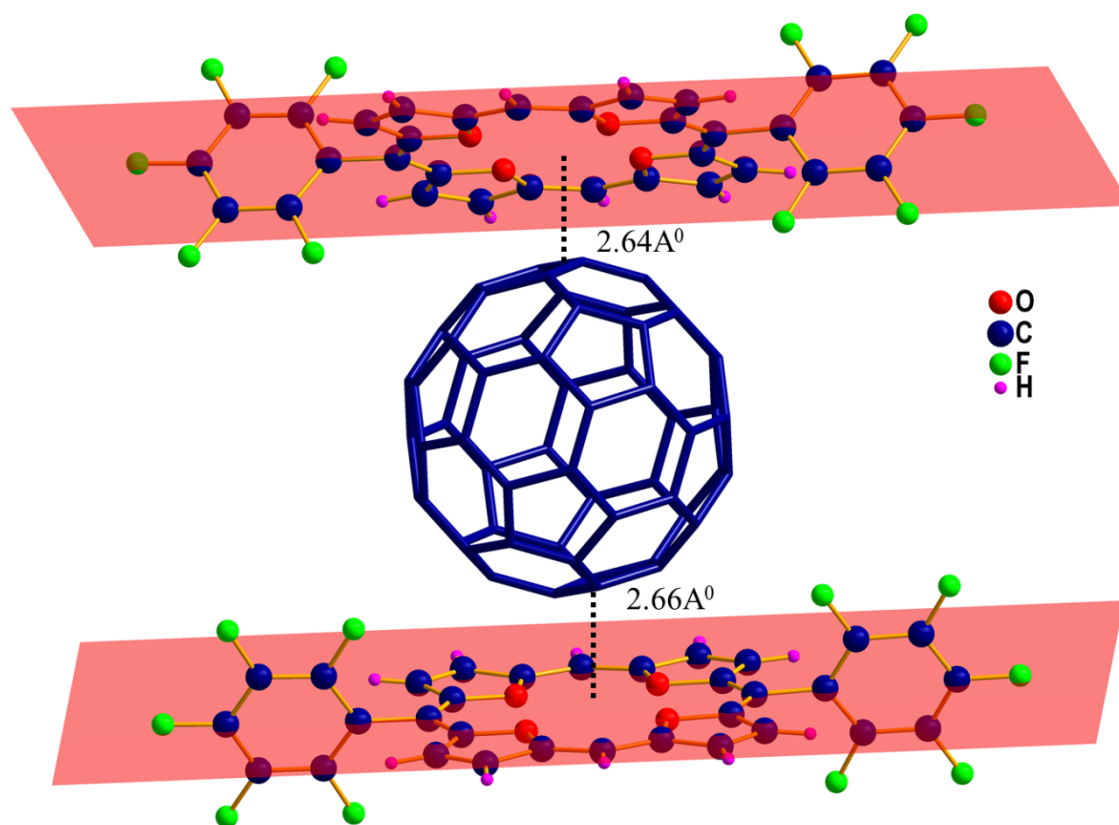

**S17:** Close approach of  $C_{60}$  to the molecular plane of the isophlorin in **5.C<sub>60</sub>** complex.

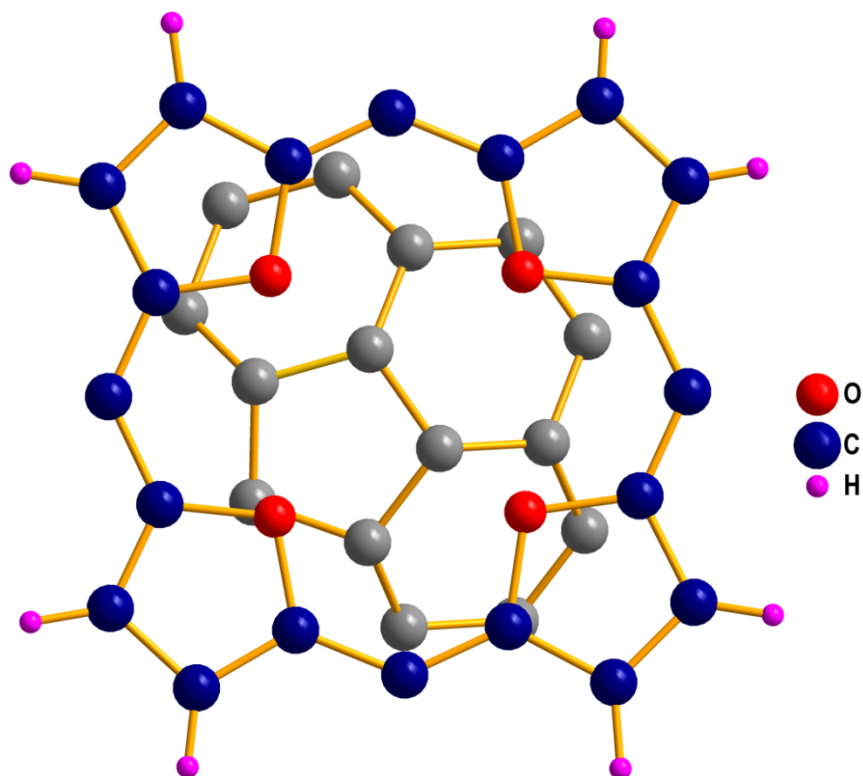

**S18:** The electron-deficient 5:6 ring juncture, C-C bond of fullerene lies over the centre of the isophlorin in **4.(C60)<sub>2</sub>** and **5.C<sub>60</sub>**. For clarity, the partial fullerene is in gray color.

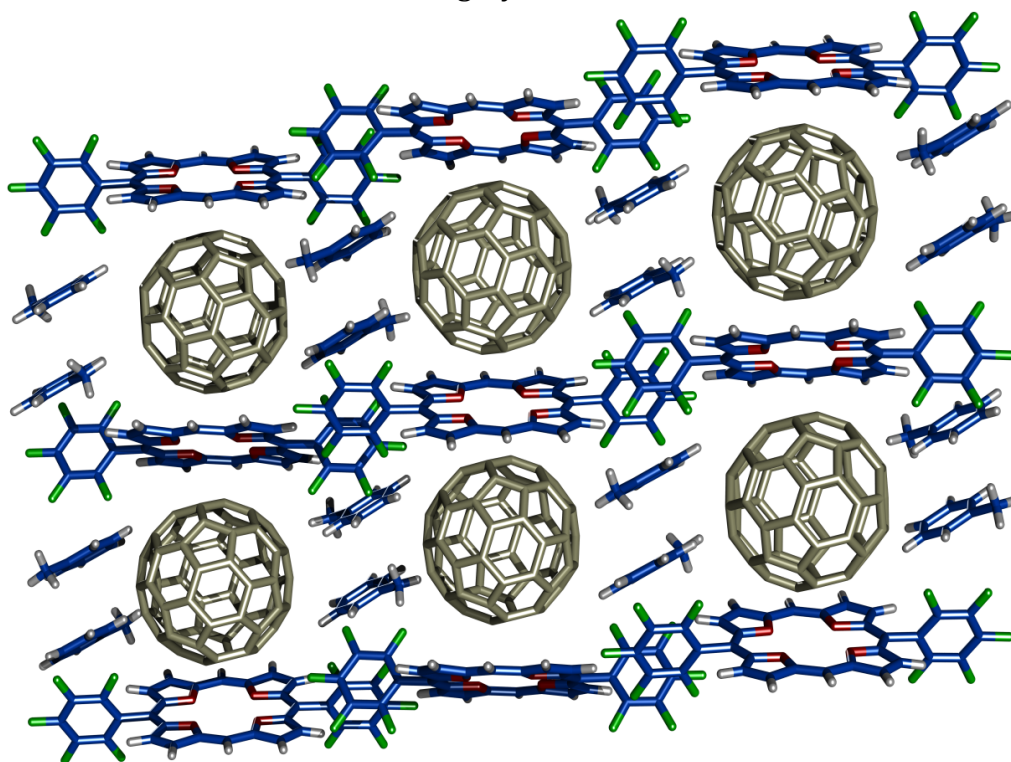

**S19:** Alternating layered isophlorin sheets (stick model) separated by C<sub>60</sub> molecules (gray color) in **5.C<sub>60</sub>** complex. channels between columns occupied by Toluene molecules.

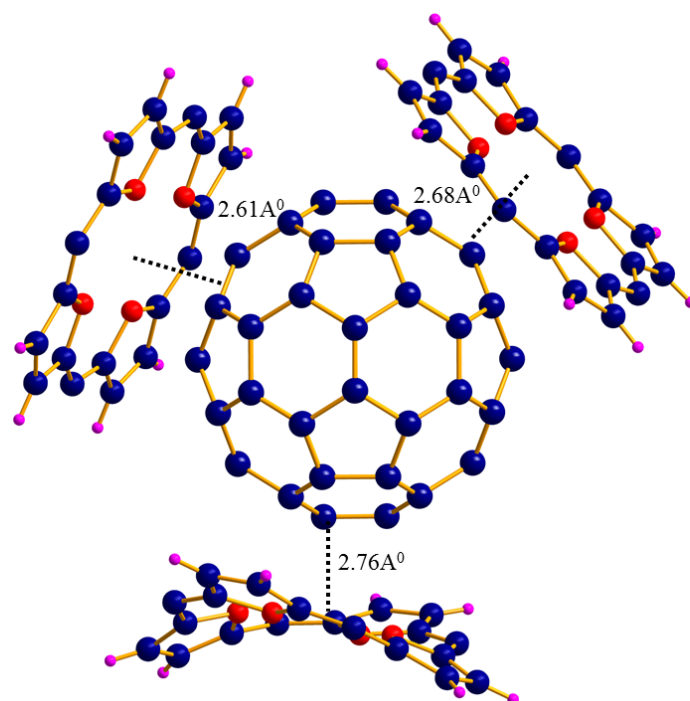

**S20:** Close approach of  $C_{60}$  to the molecular plane of the isophlorin in **(4)<sub>3</sub>.C<sub>60</sub>** complex.

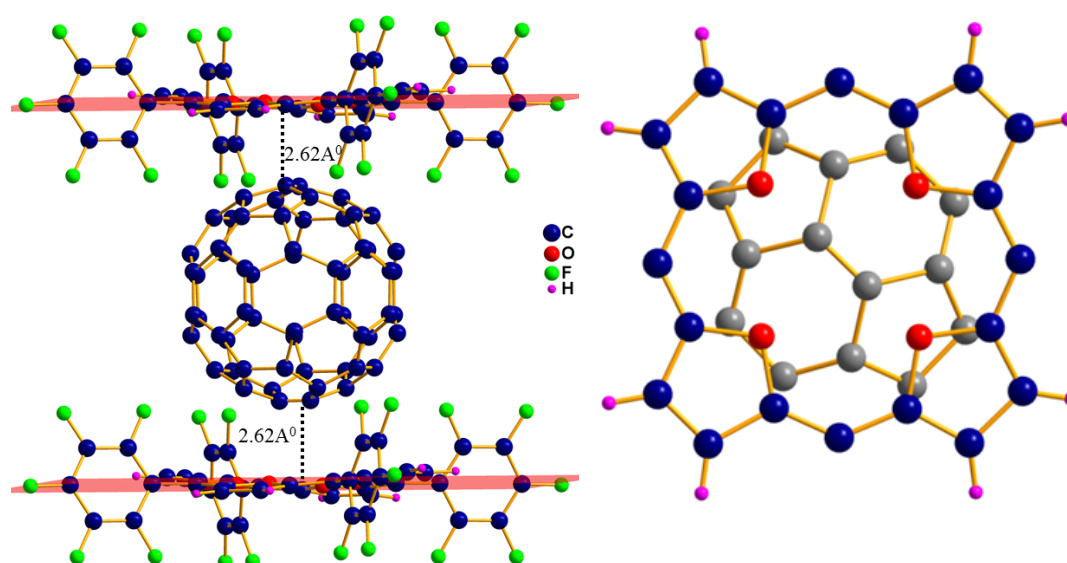

**S21:** Close approach of  $C_{60}$  to the molecular plane of the isophlorin in **3.C<sub>60</sub>** complex (left). The electron-rich 6:6 ring juncture, C-C bond of fullerene lies over the centre of the isophlorin ring **3** (right). For clarity, the partial fullerene is in gray color and meso substituents of macrocycle are omitted.

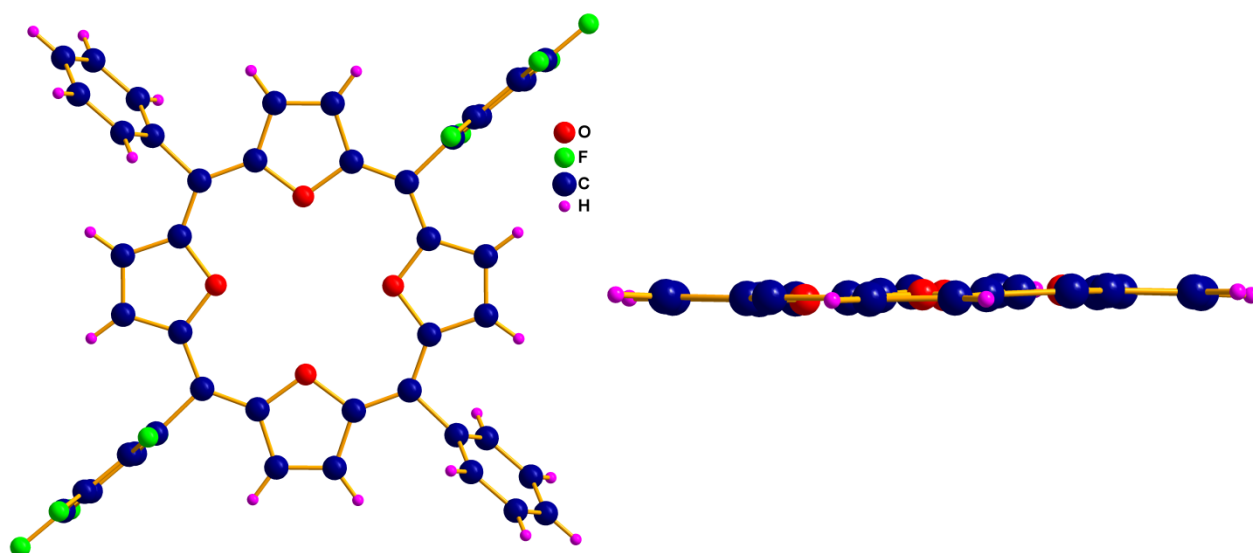

**S22:** Top view (left) Side view (right) Molecular structure of **4**. Meso-substituents are omitted for clarity.

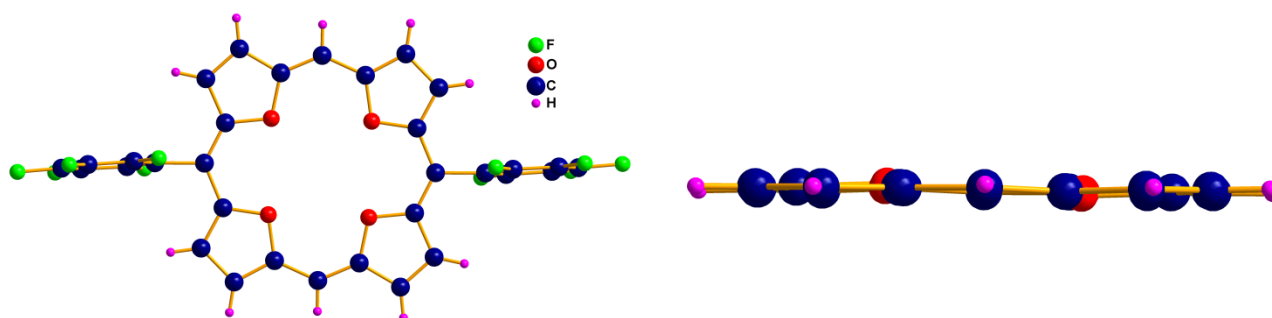

**S23:** Top view (left) Side view (right) Molecular structure of **5**. Meso-substituents are omitted for clarity.

### Determination of Binding constant:

Isothermal titration calorimetry (ITC) was used to quantify the complexations of the host (Isophlorin **4** or **5**) and guest ( $C_{60}$ ) molecules in solution. The titration was carried out in chloroform:toluene (1:1 v/v) medium for host **5** and only toluene for host **4** at 25 °C using an isothermal titration calorimeter (Microcal iTC-200) with stirring at 1000 rpm. About 200  $\mu$ l of host (**4** or **5**) solution was titrated with the guest ( $C_{60}$ ) solution. A typical titration experiment consisted of 20 consecutive injections of 2  $\mu$ l volume and 9 s duration each, with a 90 s interval between injections. Heat of dilution of the guest ( $C_{60}$ ) were determined by injecting the guest solution into the solvent alone and the total observed heats of binding were corrected for the heat of dilution. A single set binding model fitted the binding isotherm, from where binding constant (K), binding stoichiometry (N), change of enthalpy ( $\Delta H$ ) and the change of entropy

for the binding ( $\Delta S$ ) were obtained. For both the samples we have done solvent correction.

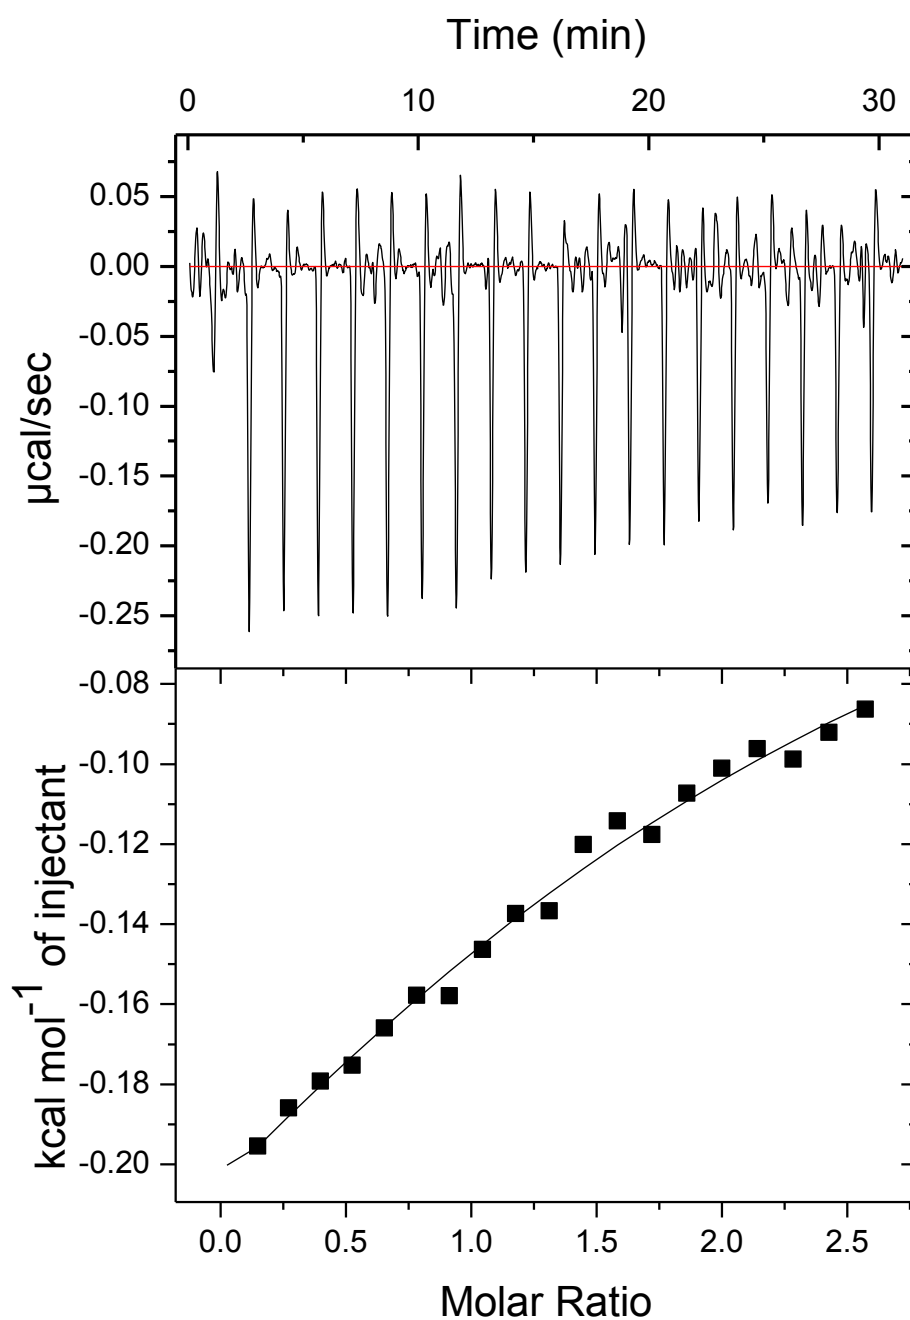

**S24:** ITC profiles for the binding of guest ( $C_{60}$ ) to host (**4**) at 25 °C in toluene. Top: raw data for the sequential 2  $\mu$ l injection of  $C_{60}$  (0.4 mM) into **4** (5 mM). Bottom: plot of the heat evolved (kcal) per mole of  $C_{60}$  added, corrected for the heat of  $C_{60}$  dilution, against the molar ratio of  $C_{60}$  to **4**. The data (filled squares) were fitted to a single set binding model and the solid line represents the best fit.

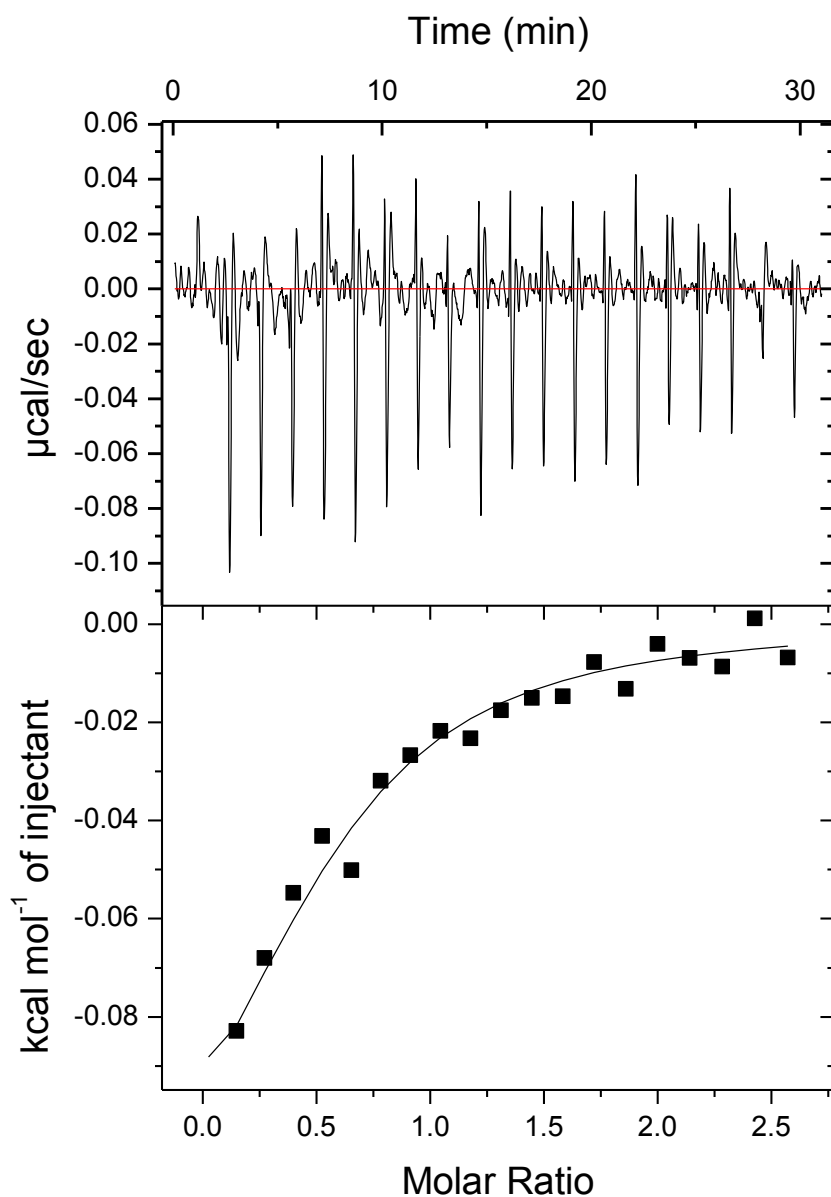

**S25:** ITC profiles for the binding of guest ( $C_{60}$ ) to host (**5**) at 25 °C in chloroform:toluene (1 : 1 v/v). Top: raw data for the sequential 2  $\mu$ l injection of  $C_{60}$  (0.4 mM) into **5** (5 mM). Bottom: plot of the heat evolved (kcal) per mole of  $C_{60}$  added, corrected for the heat of  $C_{60}$  dilution, against the molar ratio of  $C_{60}$  to **5**. The data (filled squares) were fitted to a single set binding model and the solid line represents the best fit.

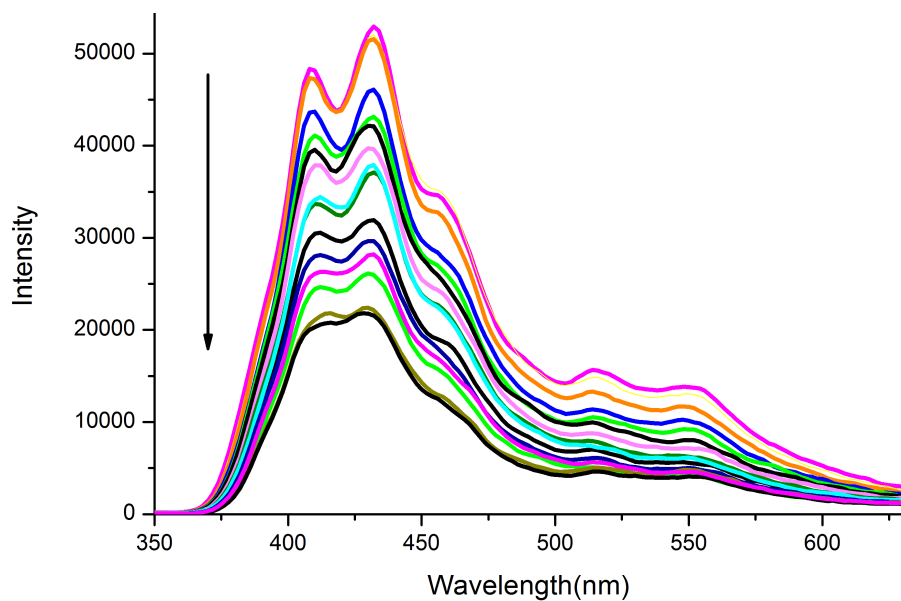

**S26:** Fluorescence titration spectra in toluene at 25  $^{\circ}\text{C}$ : Isophlorin **4** (1  $\mu\text{M}$ , excited at 326 nm; slit = 2/3 nm) with 0–30  $\mu\text{M}$  of  $\text{C}_{60}$ .

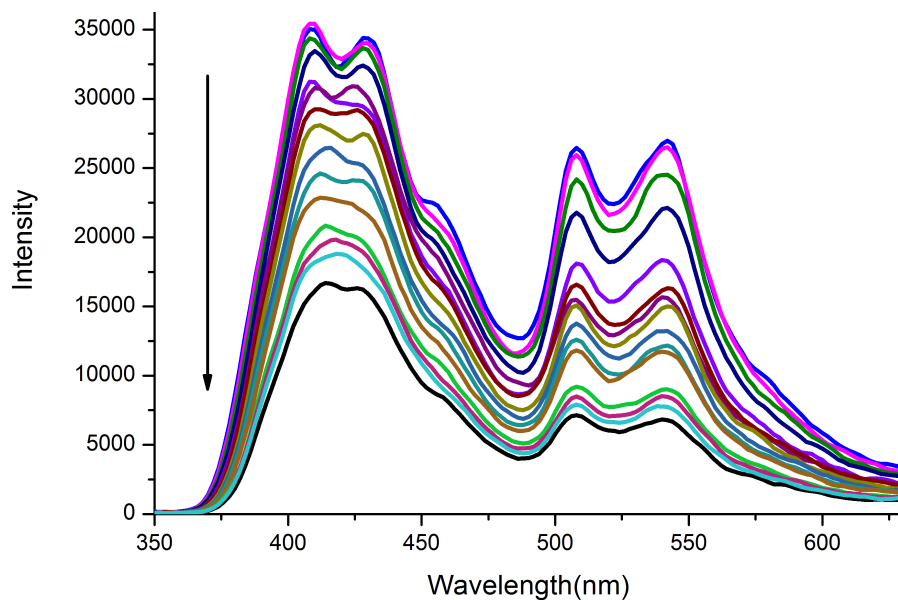

**S27:** Fluorescence titration spectra in toluene at 25  $^{\circ}\text{C}$ : Isophlorin **5** (1  $\mu\text{M}$ , excited at 326 nm; slit = 2/3 nm) with 0–30  $\mu\text{M}$  of  $\text{C}_{60}$ .



### Benesi-Hildebrand plot for binding studies of [C<sub>60</sub>] towards Isophlorin (4 and 5).

In order to determine the stoichiometry as well as binding constants of the inclusion complexes, the fluorescence intensity was analyzed using Benesi-Hildebrand (BH) plot<sup>2</sup> using the following equation (1);

$$\frac{1}{F-F_0} = \frac{1}{K(F_1-F_0)[\text{host}]} + \frac{1}{F_1-F_0} \quad (1)$$

where F<sub>0</sub>, F and F<sub>1</sub> are the fluorescence intensities of Isophlorin in absence, presence of host, and in the inclusion complex, respectively.

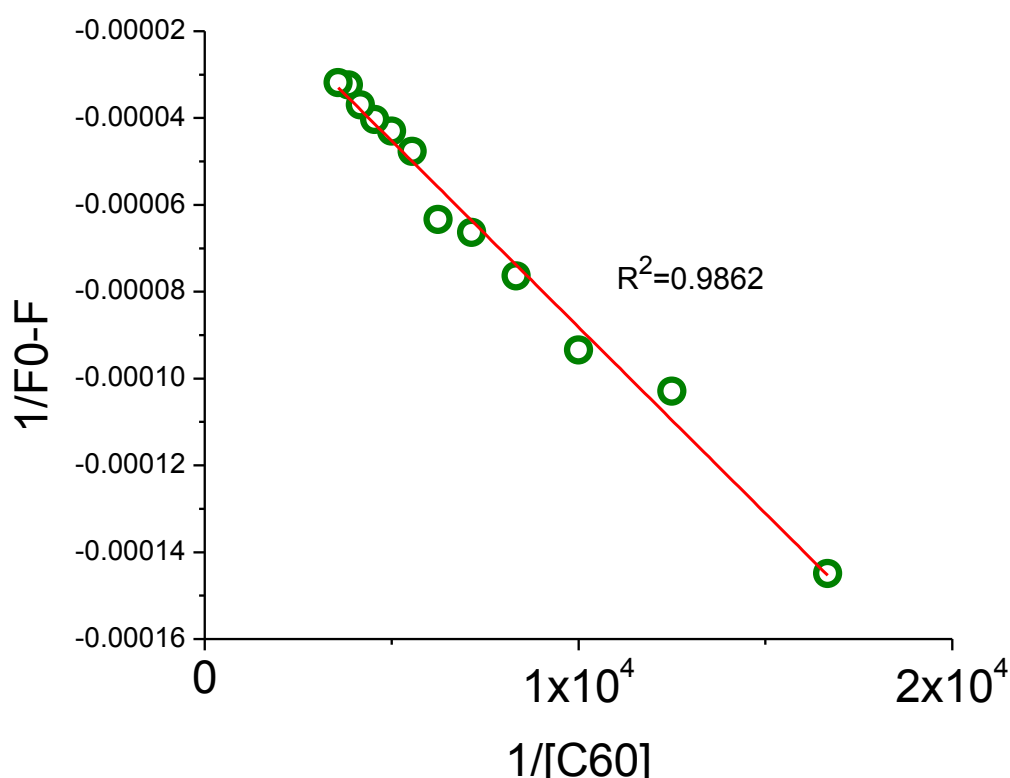

**S28:** Benesi-Hildebrand plot of **4** (1  $\mu\text{M}$ ) for varying [C<sub>60</sub>] (0 to 30  $\mu\text{M}$ )

Fluorescence titration by using  $\lambda_{\text{Ext}} = 326$ . Good linear fit confirms the 1: 1 binding stoichiometry. The association constants (K) is estimated to be  $3.712 \times 10^3 \text{ M}^{-1}$ .

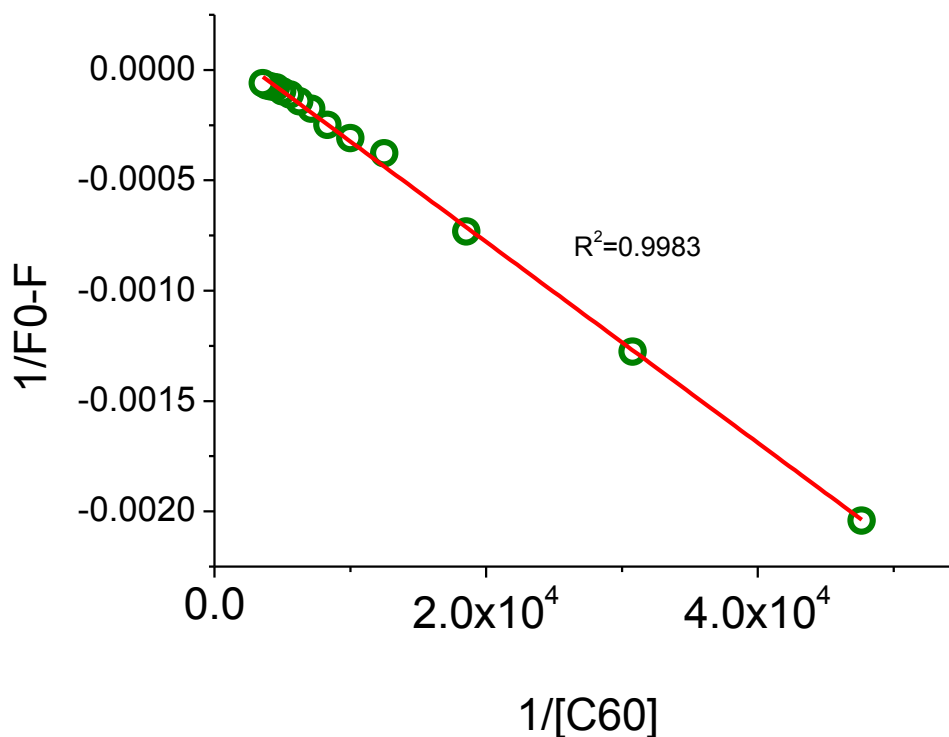

**S29:** Benesi-Hildebrand plot of **5** (1  $\mu\text{M}$ ) for varying  $[C_{60}]$  (0 to 30  $\mu\text{M}$ )  
 Fluorescence titration by using  $\lambda_{\text{Ext}} = 326$ . Good linear fit confirms the 1: 1 binding stoichiometry. The association constants (K) is estimated to be  $1.328 \times 10^3 \text{ M}^{-1}$ .

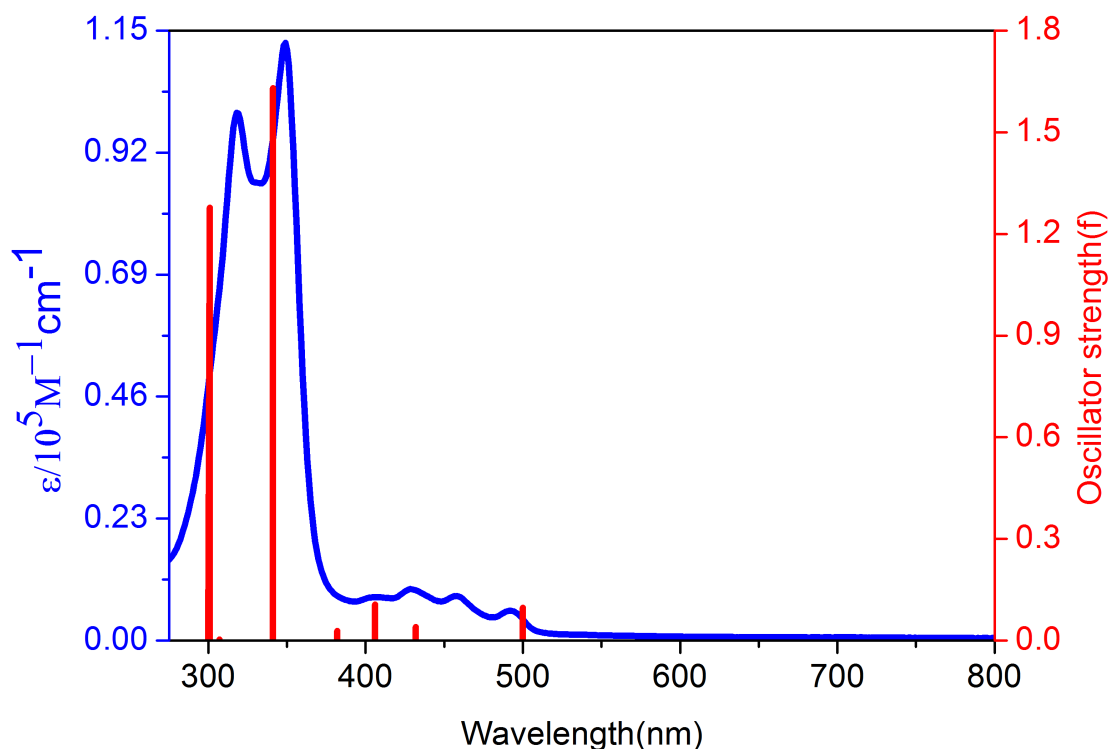

**S30:** The steady state absorption spectra (blue line) of **4** recorded in  $\text{CH}_2\text{Cl}_2$  along with the theoretical vertical excitation energies (red bar) obtained from TD-DFT calculations carried out at the B3LYP/6-31G(d,p) level.

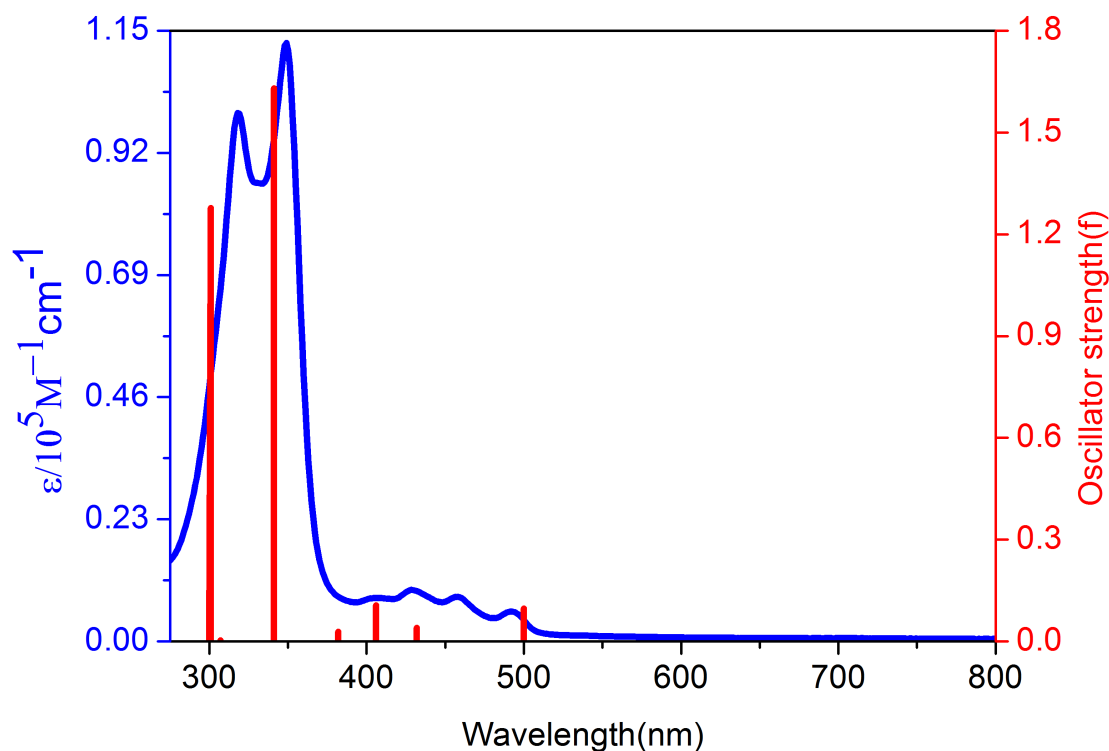

**S31:** The steady state absorption spectra (blue line) of **5** recorded in CH<sub>2</sub>Cl<sub>2</sub> along with the theoretical vertical excitation energies (red bar) obtained from TD-DFT calculations carried out at the B3LYP/6-31G(d,p) level.

| No. | Energy (cm <sup>-1</sup> ) | Wavelength (nm) | Osc. Strength | Major contributions                                   |
|-----|----------------------------|-----------------|---------------|-------------------------------------------------------|
| 1   | 6471.83744                 | 1545.156239     | 0             | HOMO→LUMO (101%)                                      |
| 2   | 19934.1304                 | 501.6521814     | 0.0791        | H-1→LUMO (29%),<br>HOMO→L+1 (70%)                     |
| 3   | 22780.48064                | 438.9723008     | 0.0242        | HOMO→L+3 (94%)                                        |
| 4   | 24325.04304                | 411.0989643     | 0.1275        | H-2→LUMO (72%),<br>HOMO→L+10 (15%)                    |
| 5   | 26013.97968                | 384.4086957     | 0.0289        | HOMO→L+4 (91%)                                        |
| 6   | 26018.01248                | 384.3491123     | 0.0001        | HOMO→L+5 (96%)                                        |
| 7   | 26188.19664                | 381.8514172     | 0.0408        | HOMO→L+6 (95%)                                        |
| 8   | 27488.37136                | 363.7901958     | 0.0898        | HOMO→L+8 (81%),<br>HOMO→L+10 (12%)                    |
| 9   | 28339.29216                | 352.8669645     | 1.6066        | H-1→LUMO (57%),<br>HOMO→L+1 (25%)                     |
| 10  | 30631.53568                | 326.4609422     | 0.0087        | H-4→LUMO (98%)                                        |
| 11  | 30786.3952                 | 324.8188018     | 0.2017        | H-6→LUMO (83%)                                        |
| 12  | 31157.4128                 | 320.9509103     | 0.1771        | H-8→LUMO (78%)                                        |
| 13  | 32350.31504                | 309.1160005     | 0.0011        | HOMO→L+12 (99%)                                       |
| 14  | 32867.32                   | 304.2535868     | 1.3052        | H-8→LUMO (13%),<br>H-2→LUMO (20%),<br>HOMO→L+10 (58%) |
| 15  | 33157.6816                 | 301.5892402     | 0.1051        | H-10→LUMO (94%)                                       |
| 16  | 36476.676                  | 274.1477869     | 0.0087        | H-12→LUMO (97%)                                       |

**S32:** Selected TD-DFT (B3LYP/6-31G (d, p)) calculated energies, oscillator strengths and compositions of the major electronic transitions of **4**.

| No. | Energy (cm <sup>-1</sup> ) | Wavelength (nm) | Osc. Strength(f) | Major contributions               |
|-----|----------------------------|-----------------|------------------|-----------------------------------|
| 1   | 6433.92912                 | 1554.260206     | 0                | HOMO→LUMO (101%)                  |
| 2   | 32497.91552                | 307.7120437     | 0.0031           | HOMO→L+8 (99%)                    |
| 3   | 38363.21984                | 260.6663372     | 0.0032           | H-1→L+2 (95%)                     |
| 4   | 30504.90576                | 327.816125      | 0.007            | H-4→LUMO (98%)                    |
| 5   | 40865.97552                | 244.702344      | 0.0084           | H-3→L+1 (41%),<br>H-1→L+5 (33%)   |
| 6   | 36566.20416                | 273.4765675     | 0.0118           | H-8→LUMO (96%)                    |
| 7   | 38771.3392                 | 257.922481      | 0.0138           | H-2→L+2 (97%)                     |
| 8   | 26175.29168                | 382.0396778     | 0.0288           | HOMO→L+4 (93%)                    |
| 9   | 39618.2272                 | 252.409073      | 0.0331           | H-10→LUMO (97%)                   |
| 10  | 23106.33088                | 432.781823      | 0.0404           | HOMO→L+3 (91%)                    |
| 11  | 19984.13712                | 500.3968868     | 0.0972           | H-1→LUMO (25%),<br>HOMO→L+1 (73%) |
| 12  | 24587.9816                 | 406.7027608     | 0.1063           | H-2→LUMO (69%),<br>HOMO→L+6 (23%) |
| 13  | 33291.57056                | 300.3763365     | 0.1509           | H-6→LUMO (93%)                    |
| 14  | 33129.452                  | 301.8462243     | 1.2777           | H-2→LUMO (26%),<br>HOMO→L+6 (72%) |
| 15  | 29245.8656                 | 341.9286725     | 1.6306           | H-1→LUMO (62%),<br>HOMO→L+1 (26%) |

**S32:** Selected TD-DFT (B3LYP/6-31G (d, p)) calculated energies, oscillator strengths and compositions of the major electronic transitions of **5**.

| Macrocycle | NICS(0) ppm <sup>a</sup> | Huckel 4n $\pi$ rule |
|------------|--------------------------|----------------------|
| <b>4</b>   | 38.13                    | Antiaromatic         |
| <b>5</b>   | 39.64                    | Antiaromatic         |

**S33:** Computational parameters to classify ring current effects in 20 $\pi$  core modified porphyrins. <sup>a</sup>Determined from quantum chemical calculations.

**S34: Coordinates for optimized structure 4**

| S.No | Atom | X           | Y           | Z           |
|------|------|-------------|-------------|-------------|
| 1    | O    | 1.38359100  | -1.56719100 | -0.14078700 |
| 2    | O    | 1.54972100  | 1.41043600  | -0.12385600 |
| 3    | F    | 5.18241800  | -1.88083200 | -1.59306700 |
| 4    | F    | 4.76593600  | 1.45693800  | 1.75919800  |
| 5    | F    | 9.01148500  | -0.11505400 | 0.48685200  |
| 6    | F    | 7.85490800  | -1.82053800 | -1.30683800 |
| 7    | F    | 7.44798200  | 1.52467800  | 2.00854400  |
| 8    | C    | 3.38520600  | -0.21836100 | -0.08316200 |
| 9    | C    | 1.35591900  | 2.70661900  | -0.53958200 |
| 10   | C    | 2.81292200  | 1.04556100  | -0.50376500 |
| 11   | C    | 1.06970100  | -2.90136000 | 0.08065300  |
| 12   | C    | 4.86461200  | -0.21637200 | 0.07726300  |
| 13   | C    | -0.16000300 | -3.43791500 | -0.18552900 |
| 14   | C    | 2.71978600  | -1.39276600 | 0.14001000  |
| 15   | C    | -0.30412300 | -4.92334800 | -0.13004900 |
| 16   | C    | 5.70381900  | -1.03792700 | -0.68937800 |
| 17   | C    | 3.41058700  | 2.08322500  | -1.18590000 |
| 18   | H    | 4.40196900  | 2.07139500  | -1.61325200 |
| 19   | C    | 2.47995400  | 3.14687500  | -1.20547500 |
| 20   | H    | 2.60588600  | 4.12285000  | -1.64862800 |
| 21   | C    | 5.49885200  | 0.64687100  | 0.98451000  |
| 22   | C    | 3.24511900  | -2.64049400 | 0.63766800  |
| 23   | H    | 4.25463500  | -2.78493200 | 0.99111700  |
| 24   | C    | 2.24567300  | -3.55308200 | 0.59663600  |
| 25   | H    | 2.28231300  | -4.58609000 | 0.90709200  |
| 26   | C    | 7.68265500  | -0.14596500 | 0.35273600  |
| 27   | C    | 7.09045300  | -1.01822300 | -0.55563600 |
| 28   | C    | -1.30102100 | -5.51825100 | 0.66372100  |
| 29   | H    | -1.96698800 | -4.88508200 | 1.24109900  |
| 30   | C    | 6.88199300  | 0.69337500  | 1.12518500  |
| 31   | C    | -1.42996900 | -6.90379800 | 0.72436600  |
| 32   | H    | -2.19814700 | -7.34484700 | 1.35286700  |
| 33   | C    | 0.54329600  | -5.75965900 | -0.87625600 |
| 34   | H    | 1.29535500  | -5.31277000 | -1.51893500 |
| 35   | C    | -0.57334300 | -7.72411900 | -0.01438900 |

|    |   |             |             |             |
|----|---|-------------|-------------|-------------|
| 36 | H | -0.67793200 | -8.80410000 | 0.03098900  |
| 37 | C | 0.41177000  | -7.14742600 | -0.81616300 |
| 38 | H | 1.07295500  | -7.77605300 | -1.40552900 |
| 39 | O | -1.38360200 | 1.56716600  | -0.14076200 |
| 40 | O | -1.54972500 | -1.41045400 | -0.12387300 |
| 41 | F | -4.76608700 | -1.45677400 | 1.75937700  |
| 42 | F | -5.18232000 | 1.88071500  | -1.59320300 |
| 43 | F | -9.01152900 | 0.11523200  | 0.48669300  |
| 44 | F | -7.44815200 | -1.52441000 | 2.00860700  |
| 45 | F | -7.85483100 | 1.82052100  | -1.30708800 |
| 46 | C | -3.38521700 | 0.21832400  | -0.08309400 |
| 47 | C | -1.35599300 | -2.70669500 | -0.53944900 |
| 48 | C | -2.81299800 | -1.04563500 | -0.50362300 |
| 49 | C | -1.06971000 | 2.90133100  | 0.08070200  |
| 50 | C | -4.86464000 | 0.21639700  | 0.07729500  |
| 51 | C | 0.15997600  | 3.43788700  | -0.18556600 |
| 52 | C | -2.71978700 | 1.39273100  | 0.14007000  |
| 53 | C | 0.30417200  | 4.92330800  | -0.13005000 |
| 54 | C | -5.49894300 | -0.64675500 | 0.98458300  |
| 55 | C | -3.41076400 | -2.08340200 | -1.18552100 |
| 56 | H | -4.40220600 | -2.07164100 | -1.61273500 |
| 57 | C | -2.48011300 | -3.14702700 | -1.20515800 |
| 58 | H | -2.60611500 | -4.12305100 | -1.64817800 |
| 59 | C | -5.70378500 | 1.03791900  | -0.68945300 |
| 60 | C | -3.24510700 | 2.64044300  | 0.63778000  |
| 61 | H | -4.25460200 | 2.78486500  | 0.99129700  |
| 62 | C | -2.24566100 | 3.55303400  | 0.59674600  |
| 63 | H | -2.28228600 | 4.58602000  | 0.90727900  |
| 64 | C | -7.68269000 | 0.14609700  | 0.35264400  |
| 65 | C | -6.88209100 | -0.69319900 | 1.12520300  |
| 66 | C | -0.54325600 | 5.75970100  | -0.87615800 |
| 67 | H | -1.29538800 | 5.31288400  | -1.51880000 |
| 68 | C | -7.09042500 | 1.01826400  | -0.55577400 |
| 69 | C | -0.41163300 | 7.14745700  | -0.81602800 |
| 70 | H | -1.07282400 | 7.77614800  | -1.40532100 |
| 71 | C | 1.30119300  | 5.51812200  | 0.66363000  |
| 72 | H | 1.96717800  | 4.88489300  | 1.24092200  |
| 73 | C | 0.57358800  | 7.72406100  | -0.01432300 |
| 74 | H | 0.67825200  | 8.80403400  | 0.03108200  |
| 75 | C | 1.43023500  | 6.90366000  | 0.72431500  |
| 76 | H | 2.19850300  | 7.34463200  | 1.35276000  |

## S35: Coordinates for optimized structure 5

| S.No | Atom | X         | Y         | Z         |
|------|------|-----------|-----------|-----------|
| 1    | O    | -1.534721 | -1.380746 | -0.251796 |
| 2    | O    | 1.557765  | -1.408472 | -0.269085 |
| 3    | C    | 7.134039  | -0.628253 | 1.043796  |
| 4    | C    | 7.157785  | 0.613012  | -1.021728 |
| 5    | C    | 5.019207  | 0.027926  | 0.007998  |
| 6    | C    | 3.525954  | 0.0298    | -0.0008   |
| 7    | C    | 5.742018  | -0.595772 | 1.032697  |
| 8    | C    | 5.764446  | 0.623191  | -1.016473 |
| 9    | C    | 7.844205  | -0.018906 | 0.011674  |
| 10   | C    | 3.523781  | -2.45088  | -0.594719 |
| 11   | H    | 4.584752  | -2.622963 | -0.687053 |
| 12   | C    | -0.025215 | -3.248212 | -0.666846 |
| 13   | H    | -0.035241 | -4.308315 | -0.901878 |
| 14   | C    | -1.262741 | -2.707319 | -0.54236  |
| 15   | C    | 2.918061  | -1.249216 | -0.283326 |
| 16   | C    | 1.298163  | -2.720656 | -0.573681 |
| 17   | C    | -2.904636 | -1.222868 | -0.240875 |
| 18   | C    | 2.486036  | -3.391634 | -0.777258 |
| 19   | H    | 2.582586  | -4.437015 | -1.032888 |
| 20   | C    | -3.513594 | -2.50229  | -0.531286 |
| 21   | H    | -4.576772 | -2.675328 | -0.59835  |
| 22   | C    | -2.516355 | -3.398392 | -0.708043 |
| 23   | H    | -2.602289 | -4.450501 | -0.942521 |
| 24   | F    | 5.141135  | 1.237968  | -2.030706 |
| 25   | F    | 7.792503  | -1.22874  | 2.041936  |
| 26   | F    | 5.093287  | -1.184581 | 2.04511   |
| 27   | F    | 7.837803  | 1.197478  | -2.015083 |
| 28   | F    | 9.179564  | -0.037764 | 0.015901  |
| 29   | O    | 1.534722  | 1.380748  | 0.251791  |
| 30   | O    | -1.557765 | 1.408474  | 0.26908   |
| 31   | C    | -7.134042 | 0.628249  | -1.043792 |
| 32   | C    | -7.157783 | -0.613012 | 1.021735  |
| 33   | C    | -5.019208 | -0.027926 | -0.007997 |
| 34   | C    | -3.525954 | -0.029799 | 0.000797  |
| 35   | C    | -5.742022 | 0.595769  | -1.032696 |
| 36   | C    | -5.764443 | -0.62319  | 1.016477  |
| 37   | C    | -7.844205 | 0.018903  | -0.011667 |

|    |   |           |           |           |
|----|---|-----------|-----------|-----------|
| 38 | C | -3.523781 | 2.450883  | 0.594713  |
| 39 | H | -4.584752 | 2.622966  | 0.687047  |
| 40 | C | 0.025215  | 3.248214  | 0.66684   |
| 41 | H | 0.035242  | 4.308317  | 0.901871  |
| 42 | C | 1.262742  | 2.70732   | 0.542354  |
| 43 | C | -2.918061 | 1.249218  | 0.283322  |
| 44 | C | -1.298162 | 2.720658  | 0.573674  |
| 45 | C | 2.904637  | 1.222869  | 0.240872  |
| 46 | C | -2.486036 | 3.391637  | 0.77725   |
| 47 | H | -2.582586 | 4.437019  | 1.032879  |
| 48 | C | 3.513594  | 2.502291  | 0.531283  |
| 49 | H | 4.576772  | 2.675329  | 0.598349  |
| 50 | C | 2.516356  | 3.398394  | 0.708038  |
| 51 | H | 2.60229   | 4.450503  | 0.942514  |
| 52 | F | -5.14113  | -1.237964 | 2.03071   |
| 53 | F | -7.79251  | 1.228733  | -2.041931 |
| 54 | F | -5.093292 | 1.184577  | -2.045112 |
| 55 | F | -7.837798 | -1.197477 | 2.015093  |
| 56 | F | -9.179565 | 0.037761  | -0.015891 |

#### References:

- 1) Gaussian 09, Revision D.01, M. J. Frisch, G. W. Trucks, H. B. Schlegel, G. E. Scuseria, M. A. Robb, J. R. Cheeseman, G. Scalmani, V. Barone, B. Mennucci, G. A. Petersson, H. Nakatsuji, M. Caricato, X. Li, H. P. Hratchian, A. F. Izmaylov, J. Bloino, G. Zheng, J. L. Sonnenberg, M. Hada, M. Ehara, K. Toyota, R. Fukuda, J. Hasegawa, M. Ishida, T. Nakajima, Y. Honda, O. Kitao, H. Nakai, T. Vreven, J. A. Montgomery, Jr., J. E. Peralta, F. Ogliaro, M. Bearpark, J. J. Heyd, E. Brothers, K. N. Kudin, V. N. Staroverov, R. Kobayashi, J. Normand, K. Raghavachari, A. Rendell, J. C. Burant, S. S. Iyengar, J. Tomasi, M. Cossi, N. Rega, J. M. Millam, M. Klene, J. E. Knox, J. B. Cross, V. Bakken, C. Adamo, J. Jaramillo, R. Gomperts, R. E. Stratmann, O. Yazyev, A. J. Austin, R. Cammi, C. Pomelli, J. W. Ochterski, R. L. Martin, K. Morokuma, V. G. Zakrzewski, G. A. Voth, P. Salvador, J. J. Dannenberg, S. Dapprich, A. D. Daniels, Ö. Farkas, J. B. Foresman, J. V. Ortiz, J. Cioslowski, and D. J. Fox, Gaussian, Inc., Wallingford CT, 2009.
- 2) Benesi, H. A.; Hildebrand, J. H. A Spectrophotometric Investigation of the Interaction of Iodine with Aromatic Hydrocarbons. *J. Am. Chem. Soc.* 1949, **71**, 2703-2707
